# Supplementary material
Source: bioRxiv or medRxiv preprint supplement (https://medrxiv.org/highwire/filestream/68620/field_highwire_adjunct_files/2/19003012-11.pdf)
Supplement: Supplementary file [file 19003012-11.pdf]

sex: 1

ACT-DTH

EST-DTH

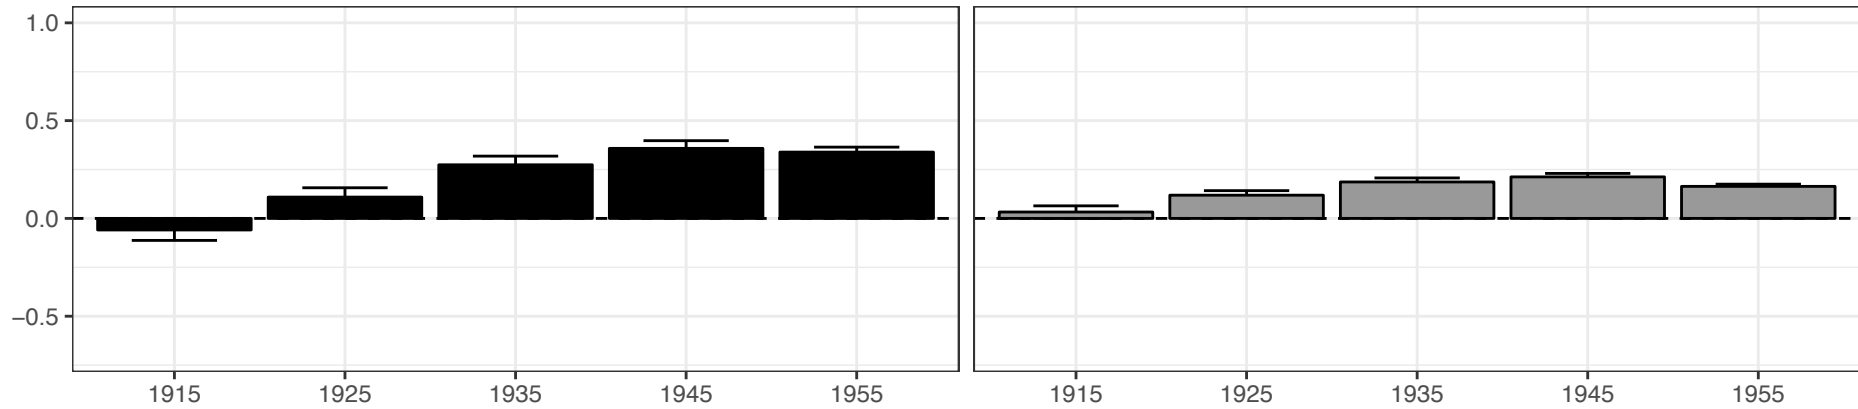

Improvements in hospital admission rate

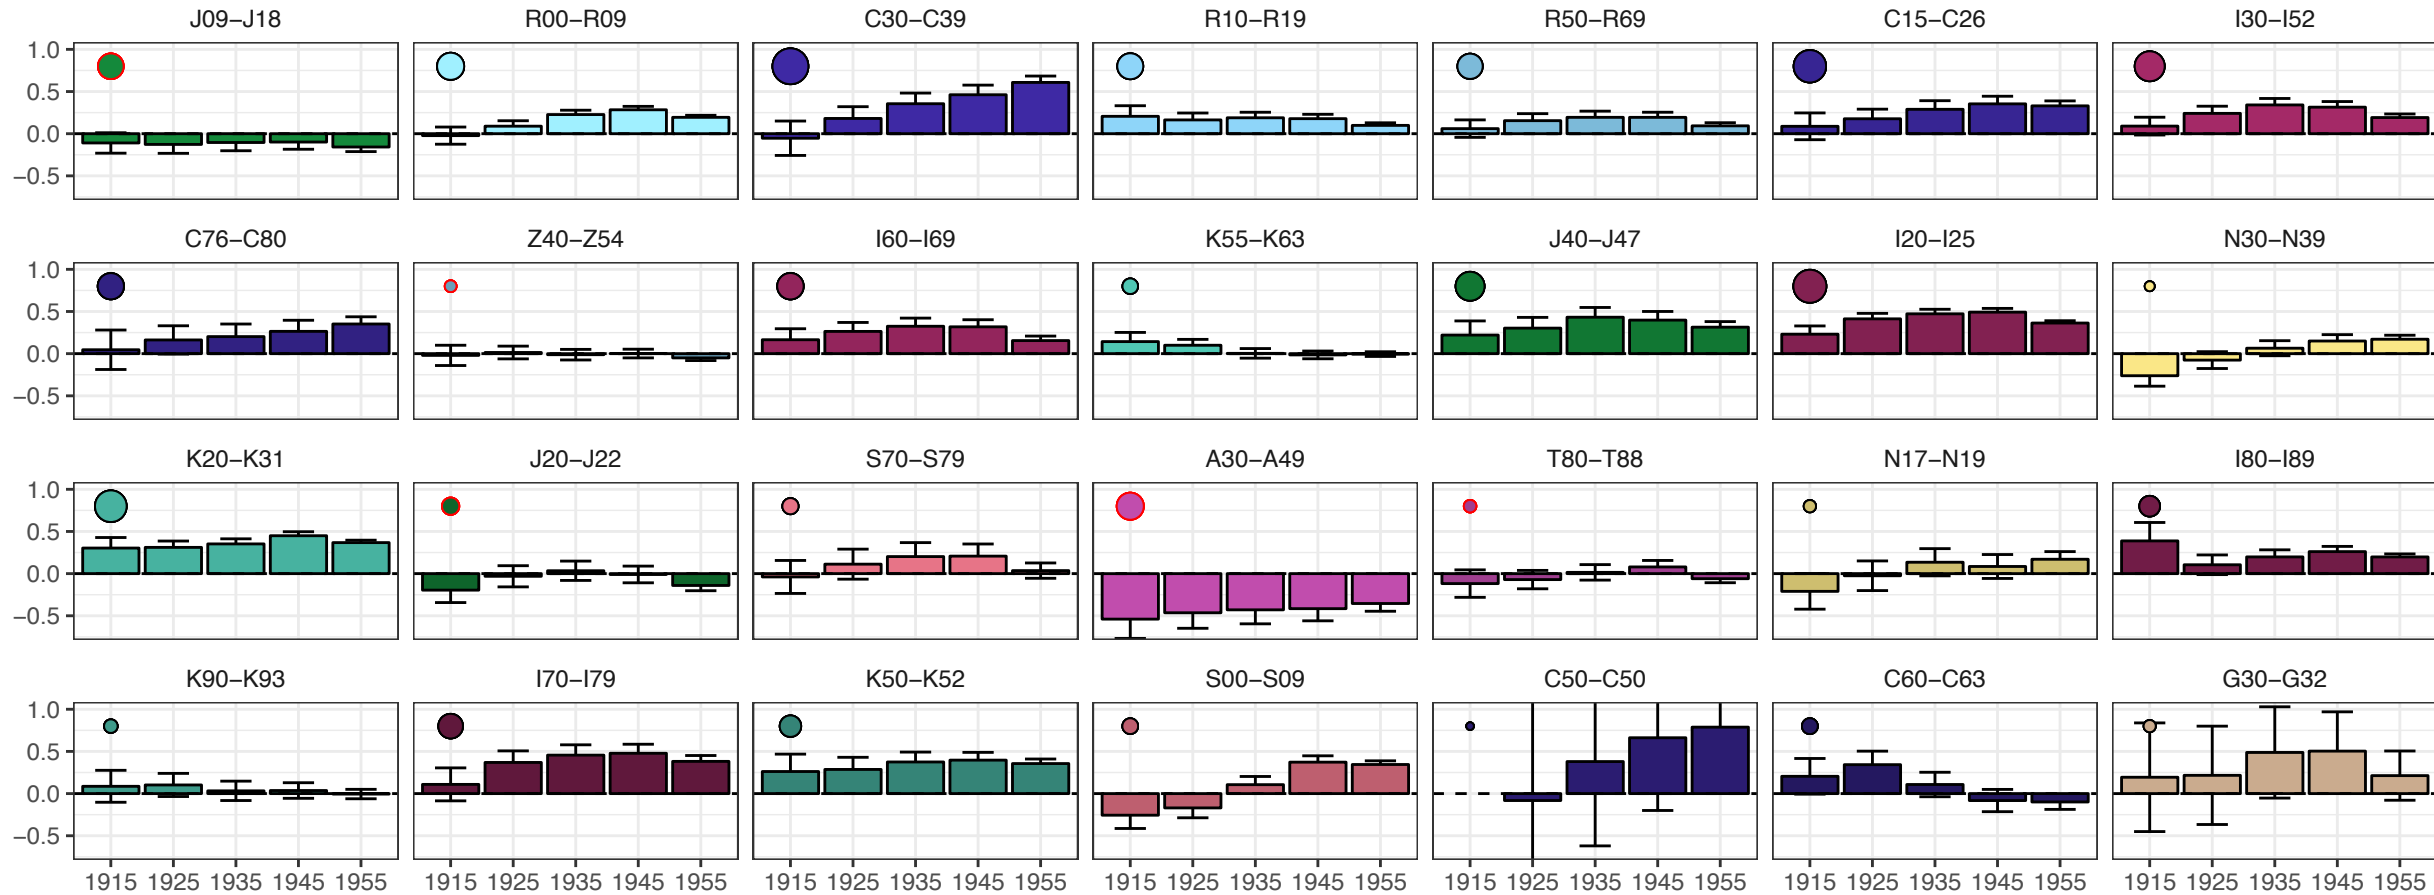

Decade of birth commencing

sex: 2

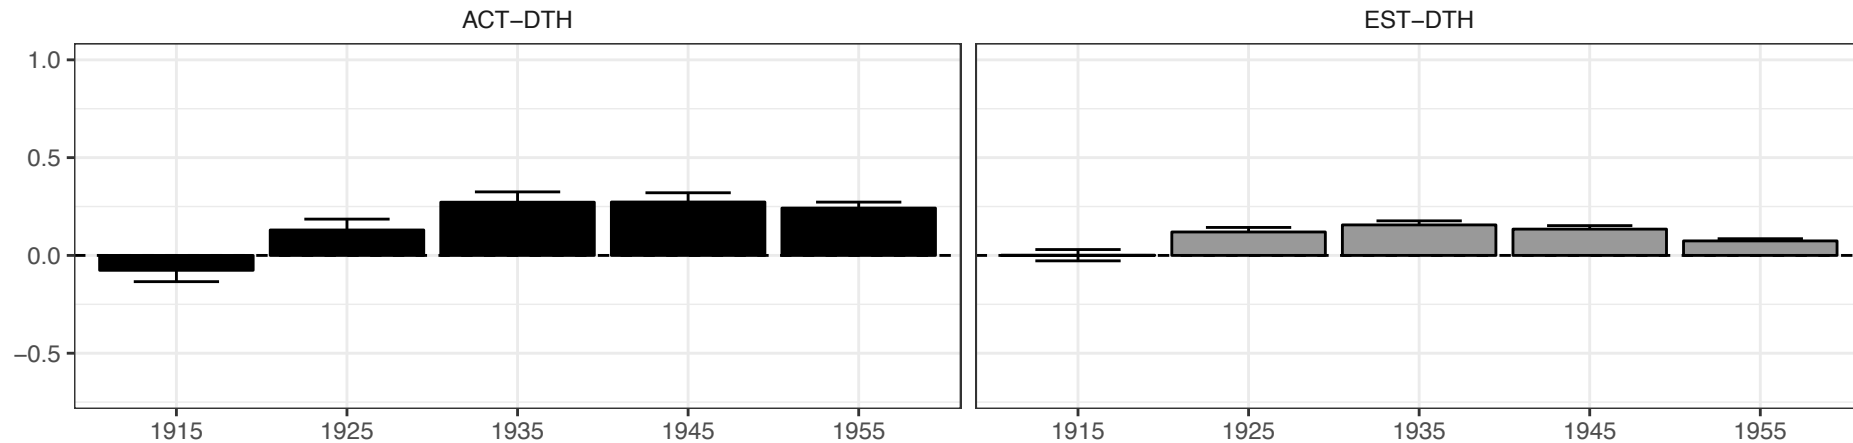

Improvements in hospital admission rate

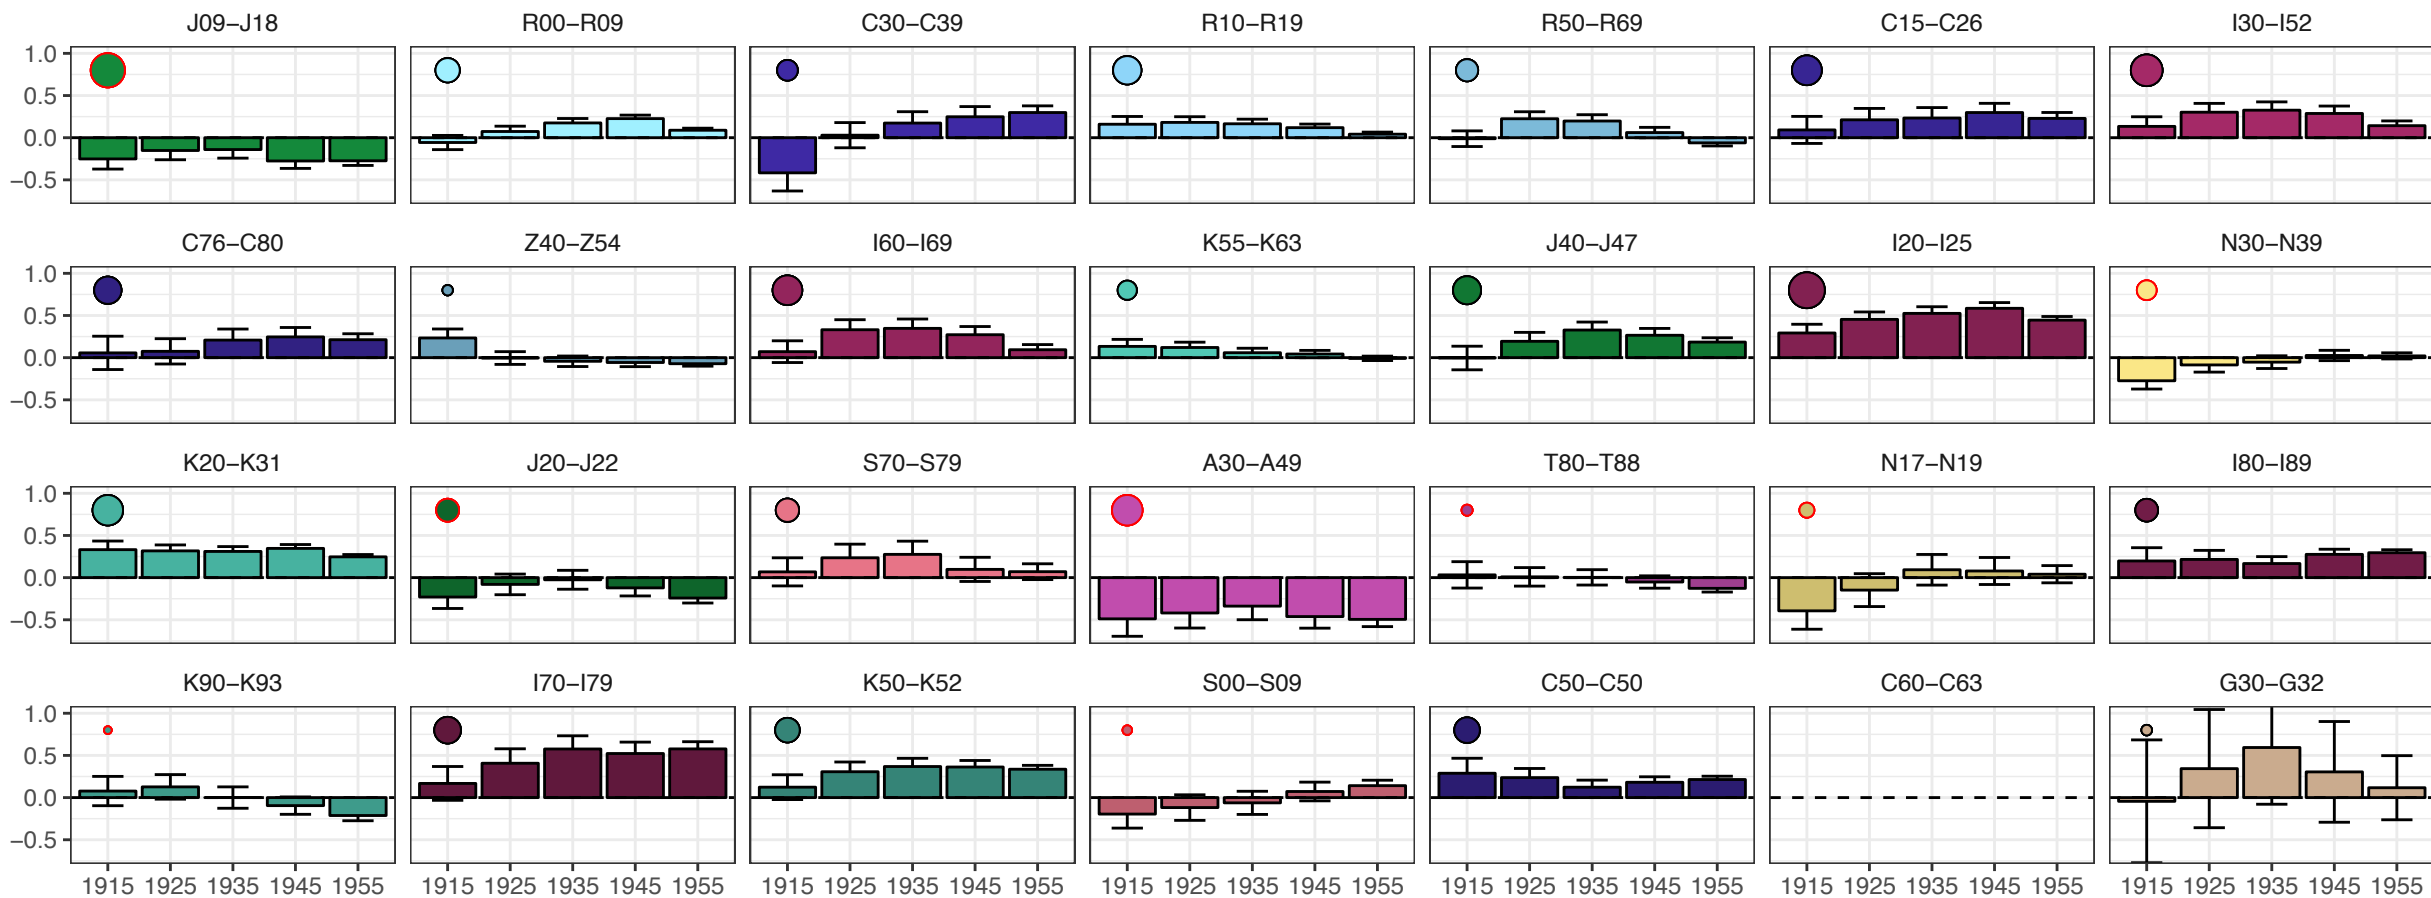

Decade of birth commencing

deprivation: 1

ACT-DTH

EST-DTH

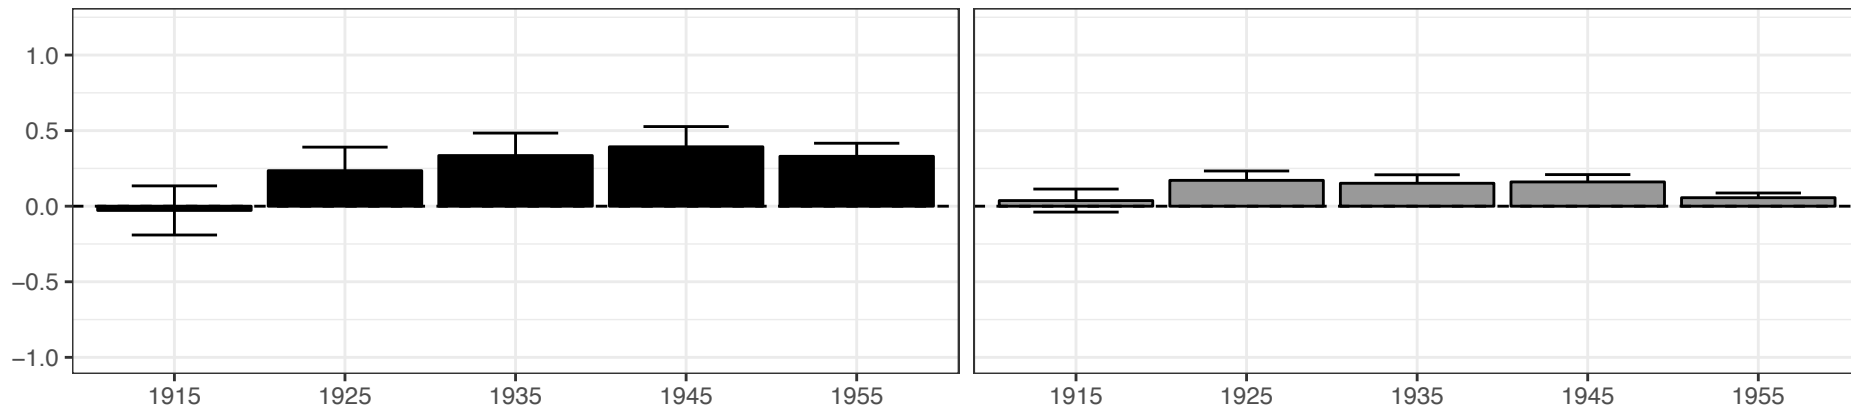

Improvements in hospital admission rate

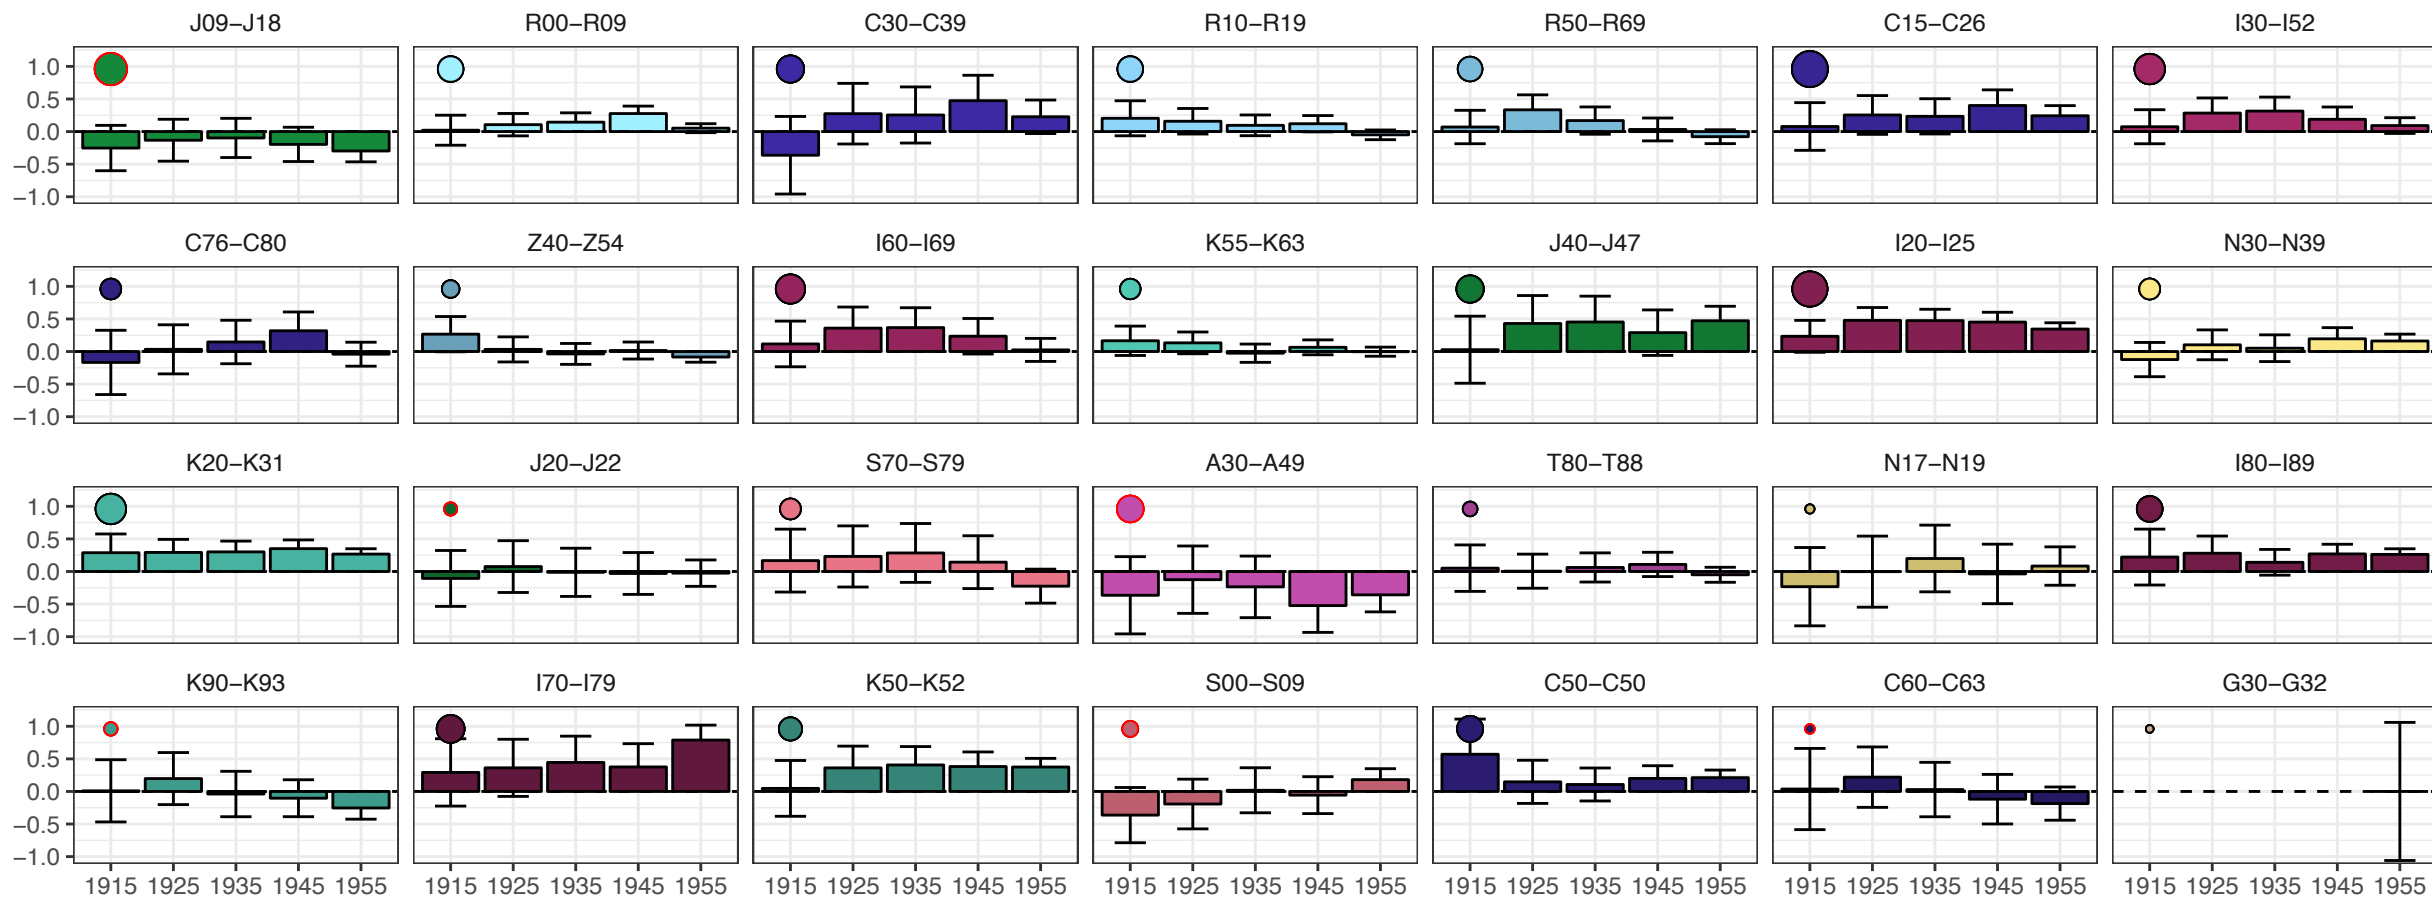

Decade of birth commencing

deprivation: 2

ACT-DTH

EST-DTH

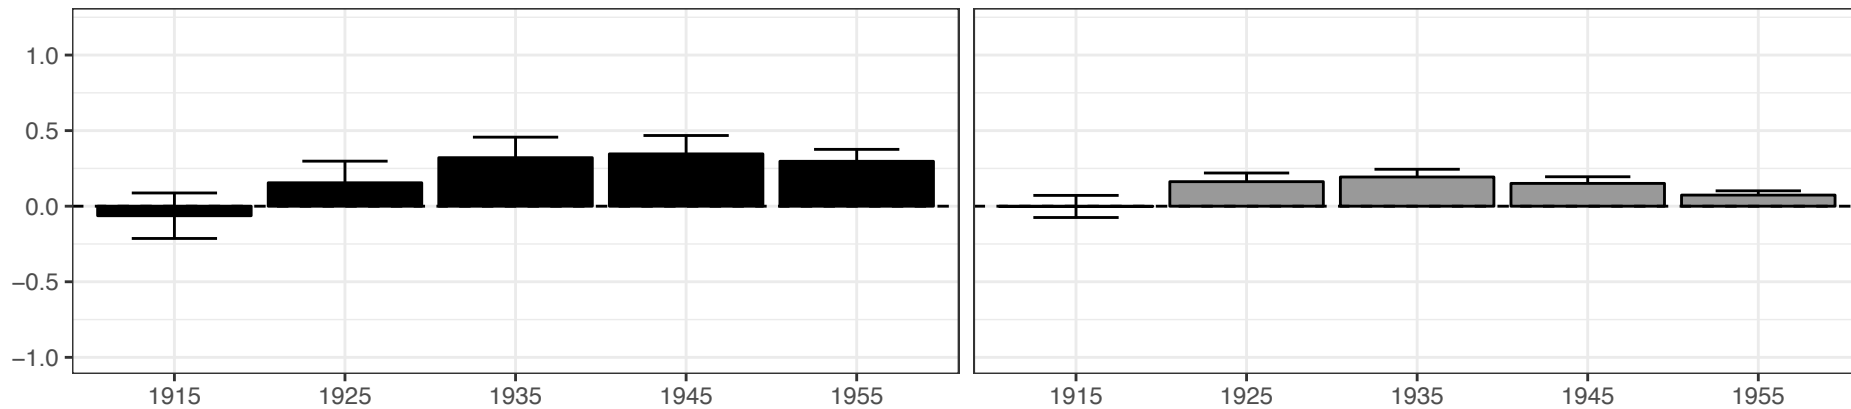

Improvements in hospital admission rate

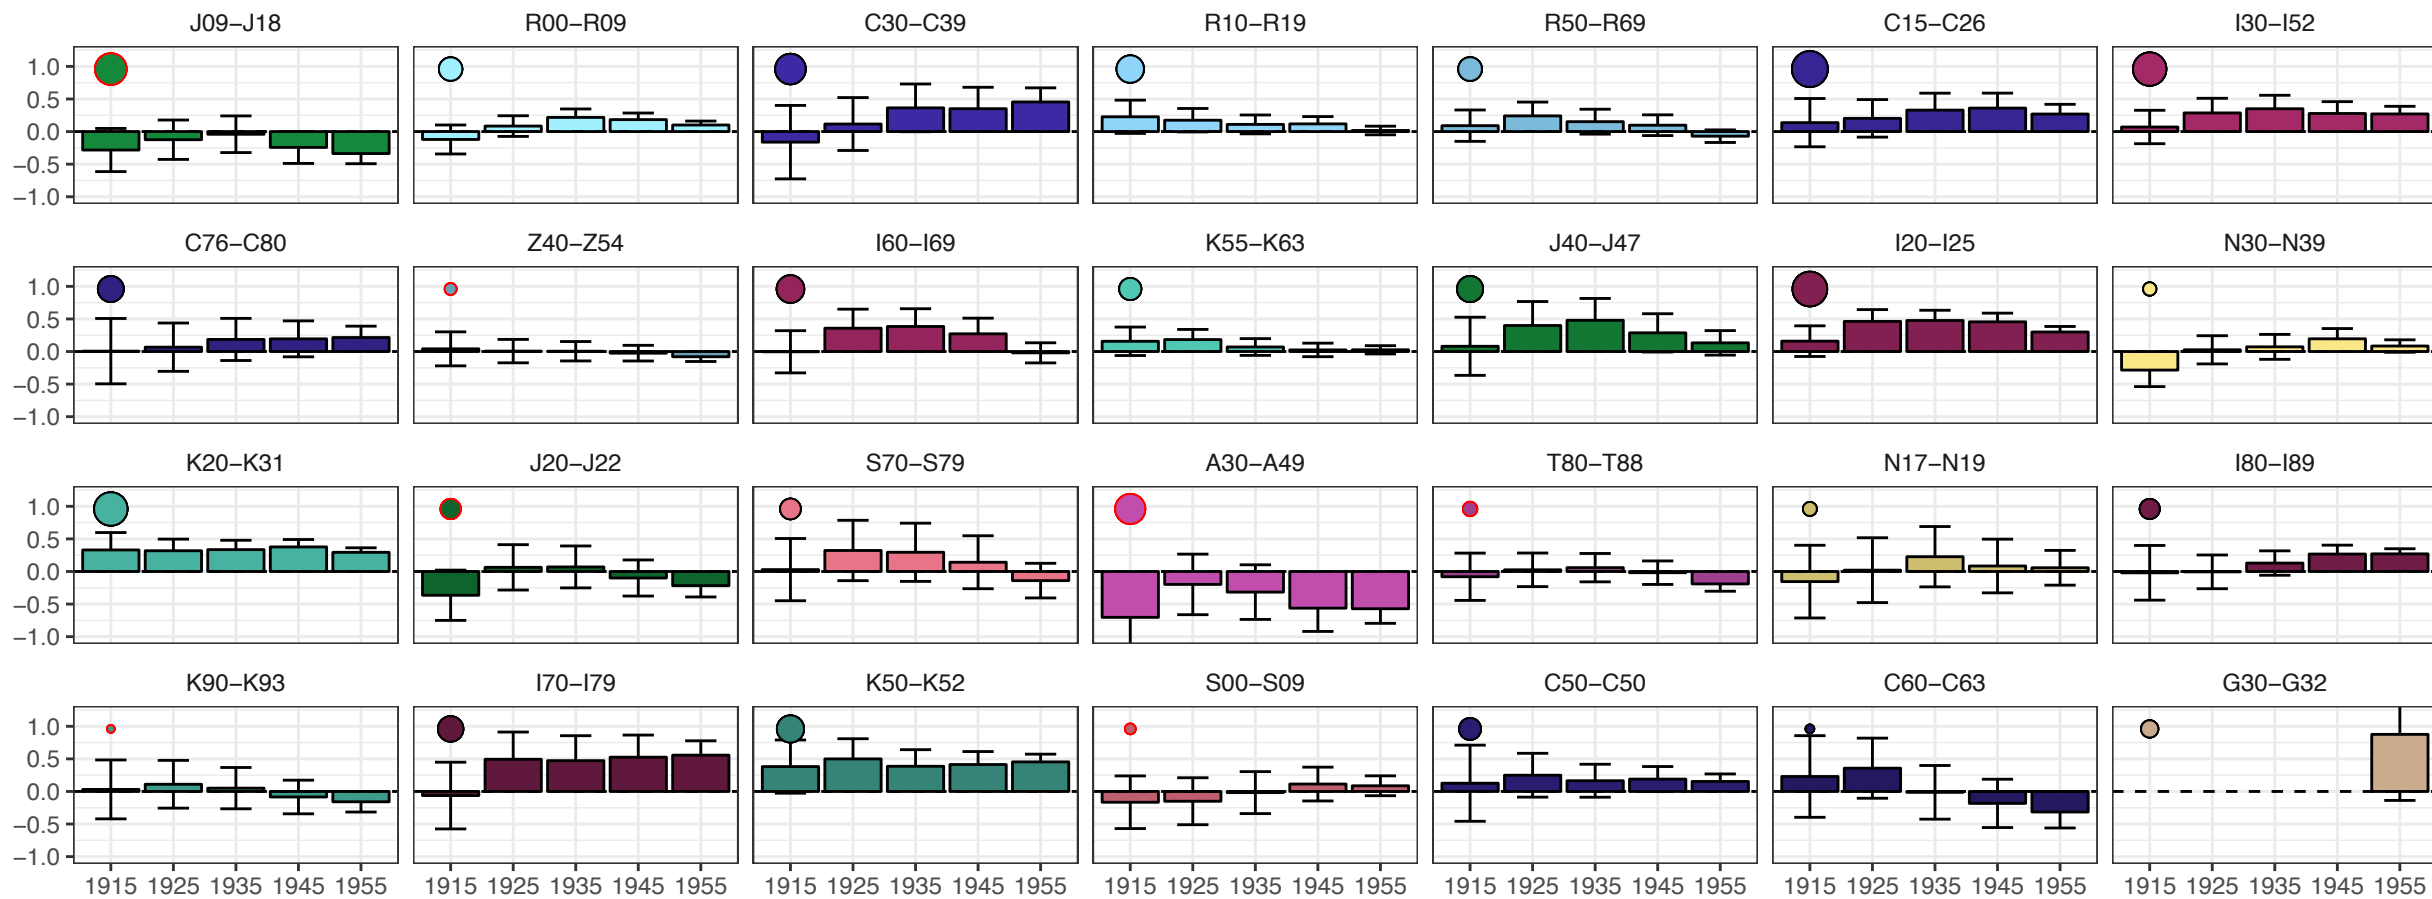

Decade of birth commencing

deprivation: 3

ACT-DTH

EST-DTH

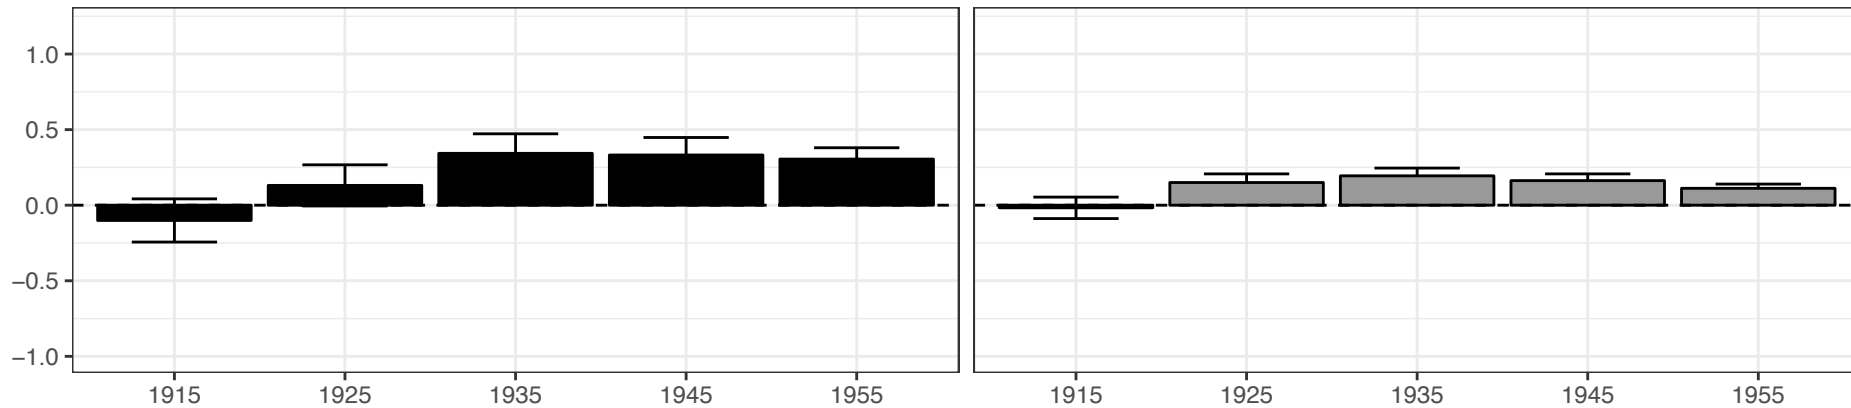

Improvements in hospital admission rate

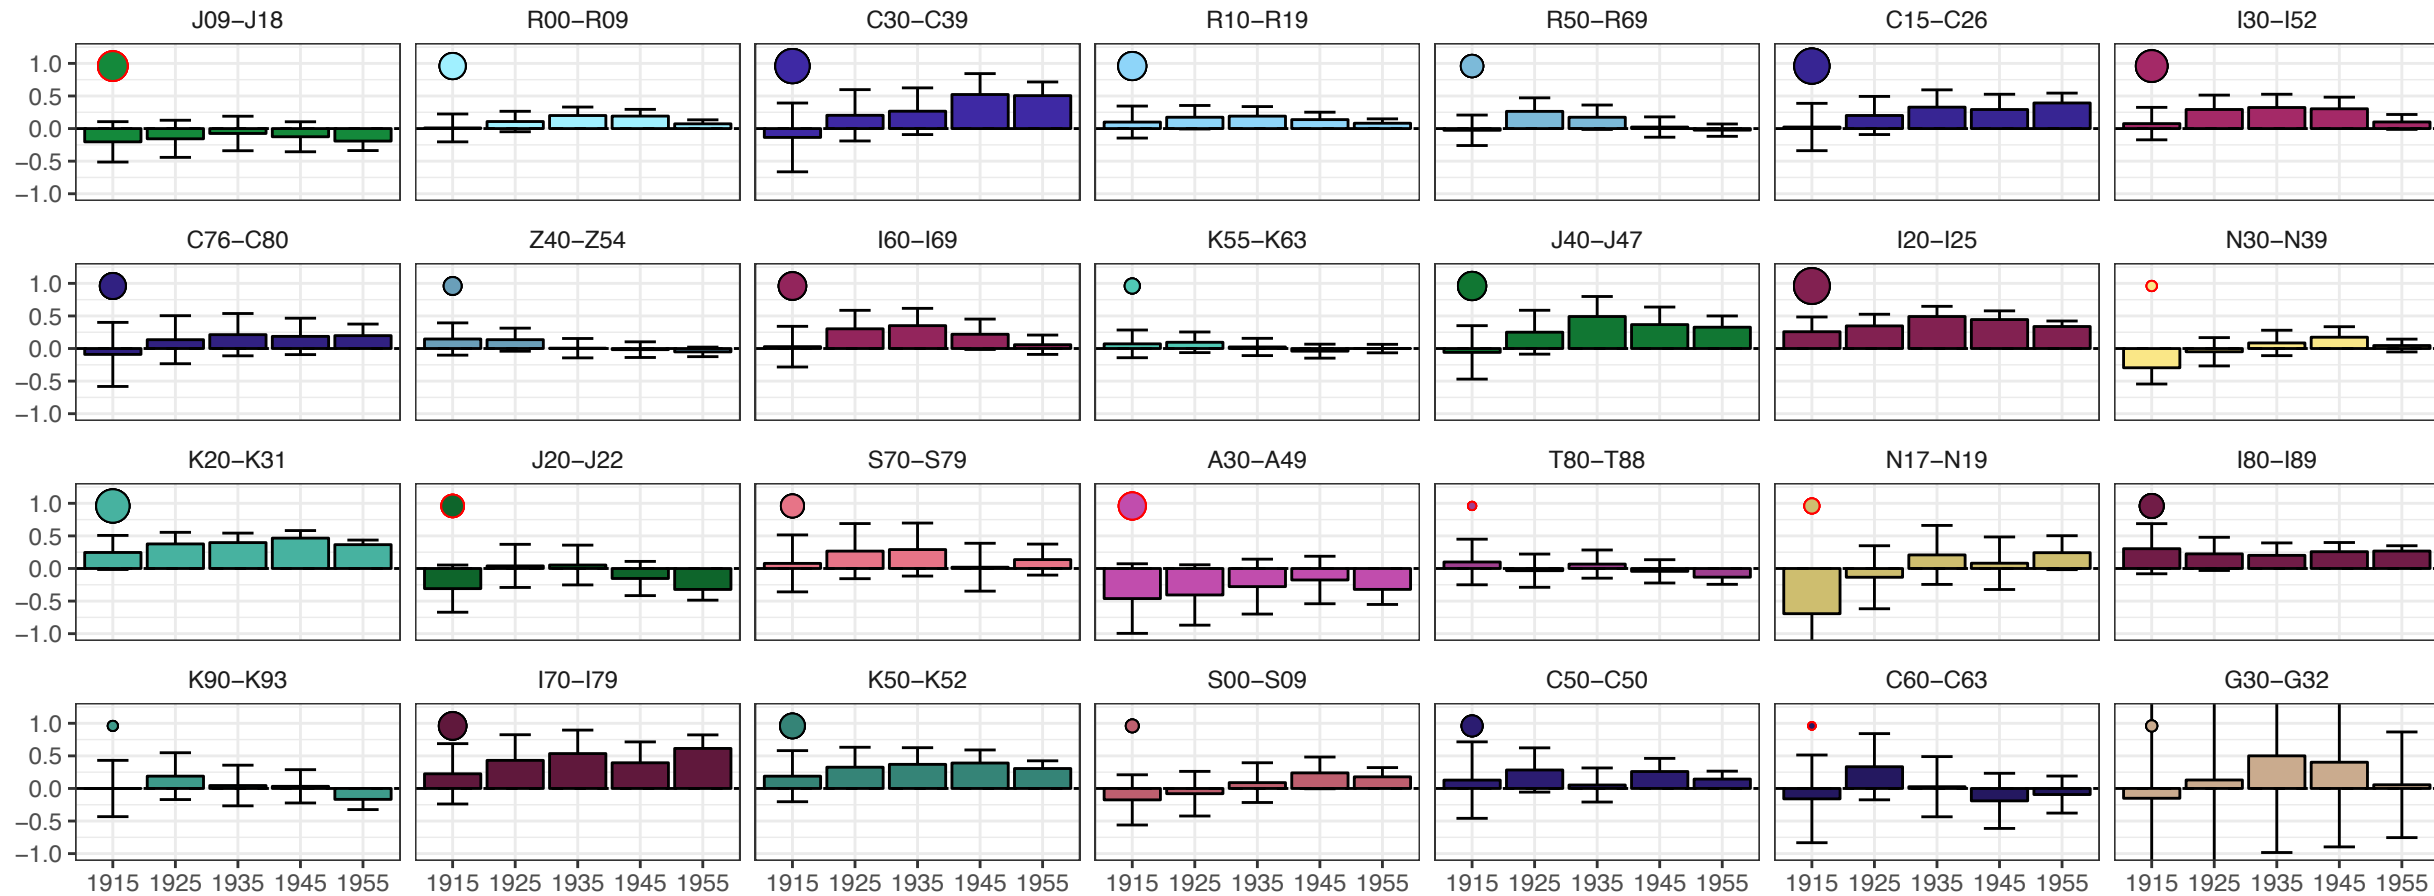

Decade of birth commencing

deprivation: 4

ACT-DTH

EST-DTH

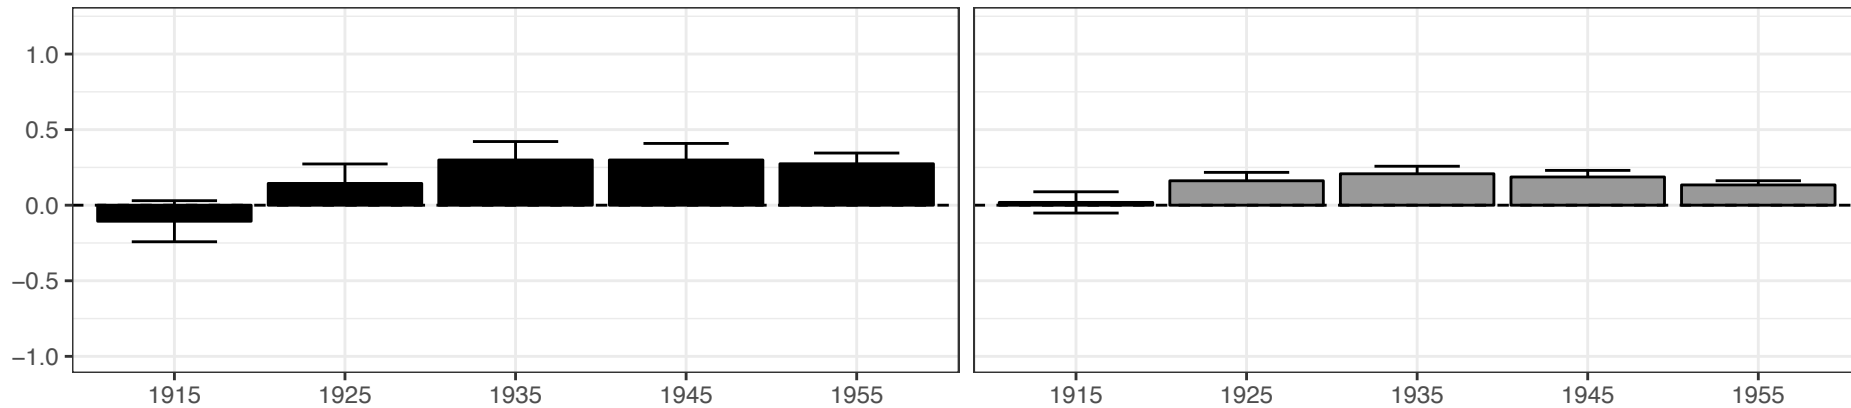

Improvements in hospital admission rate

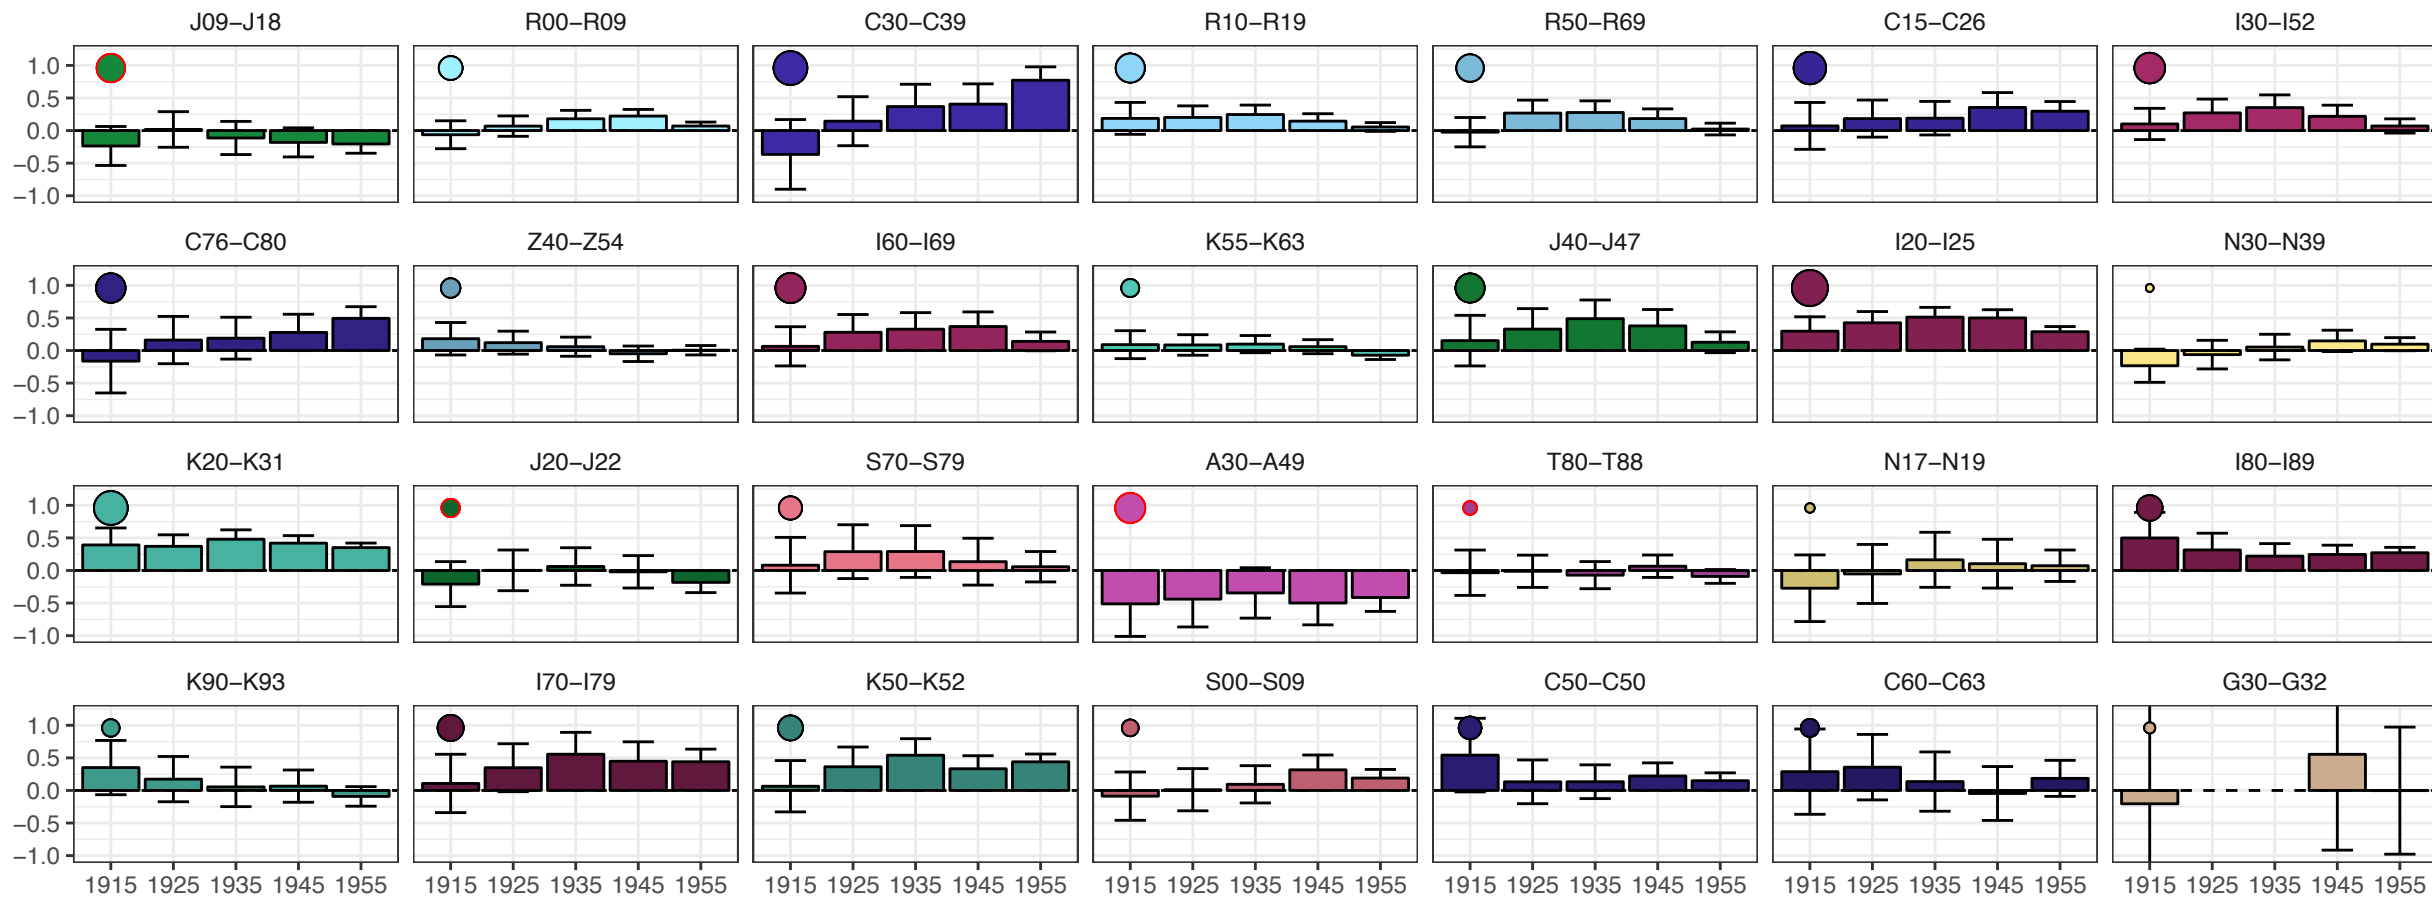

Decade of birth commencing

deprivation: 5

ACT-DTH

EST-DTH

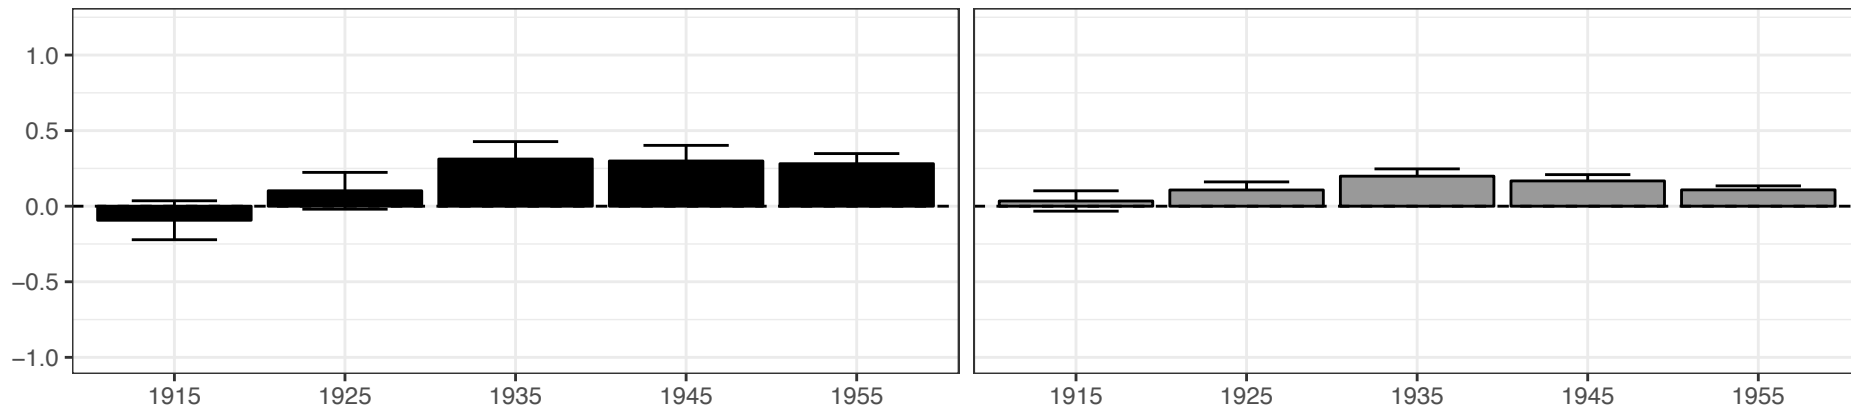

Improvements in hospital admission rate

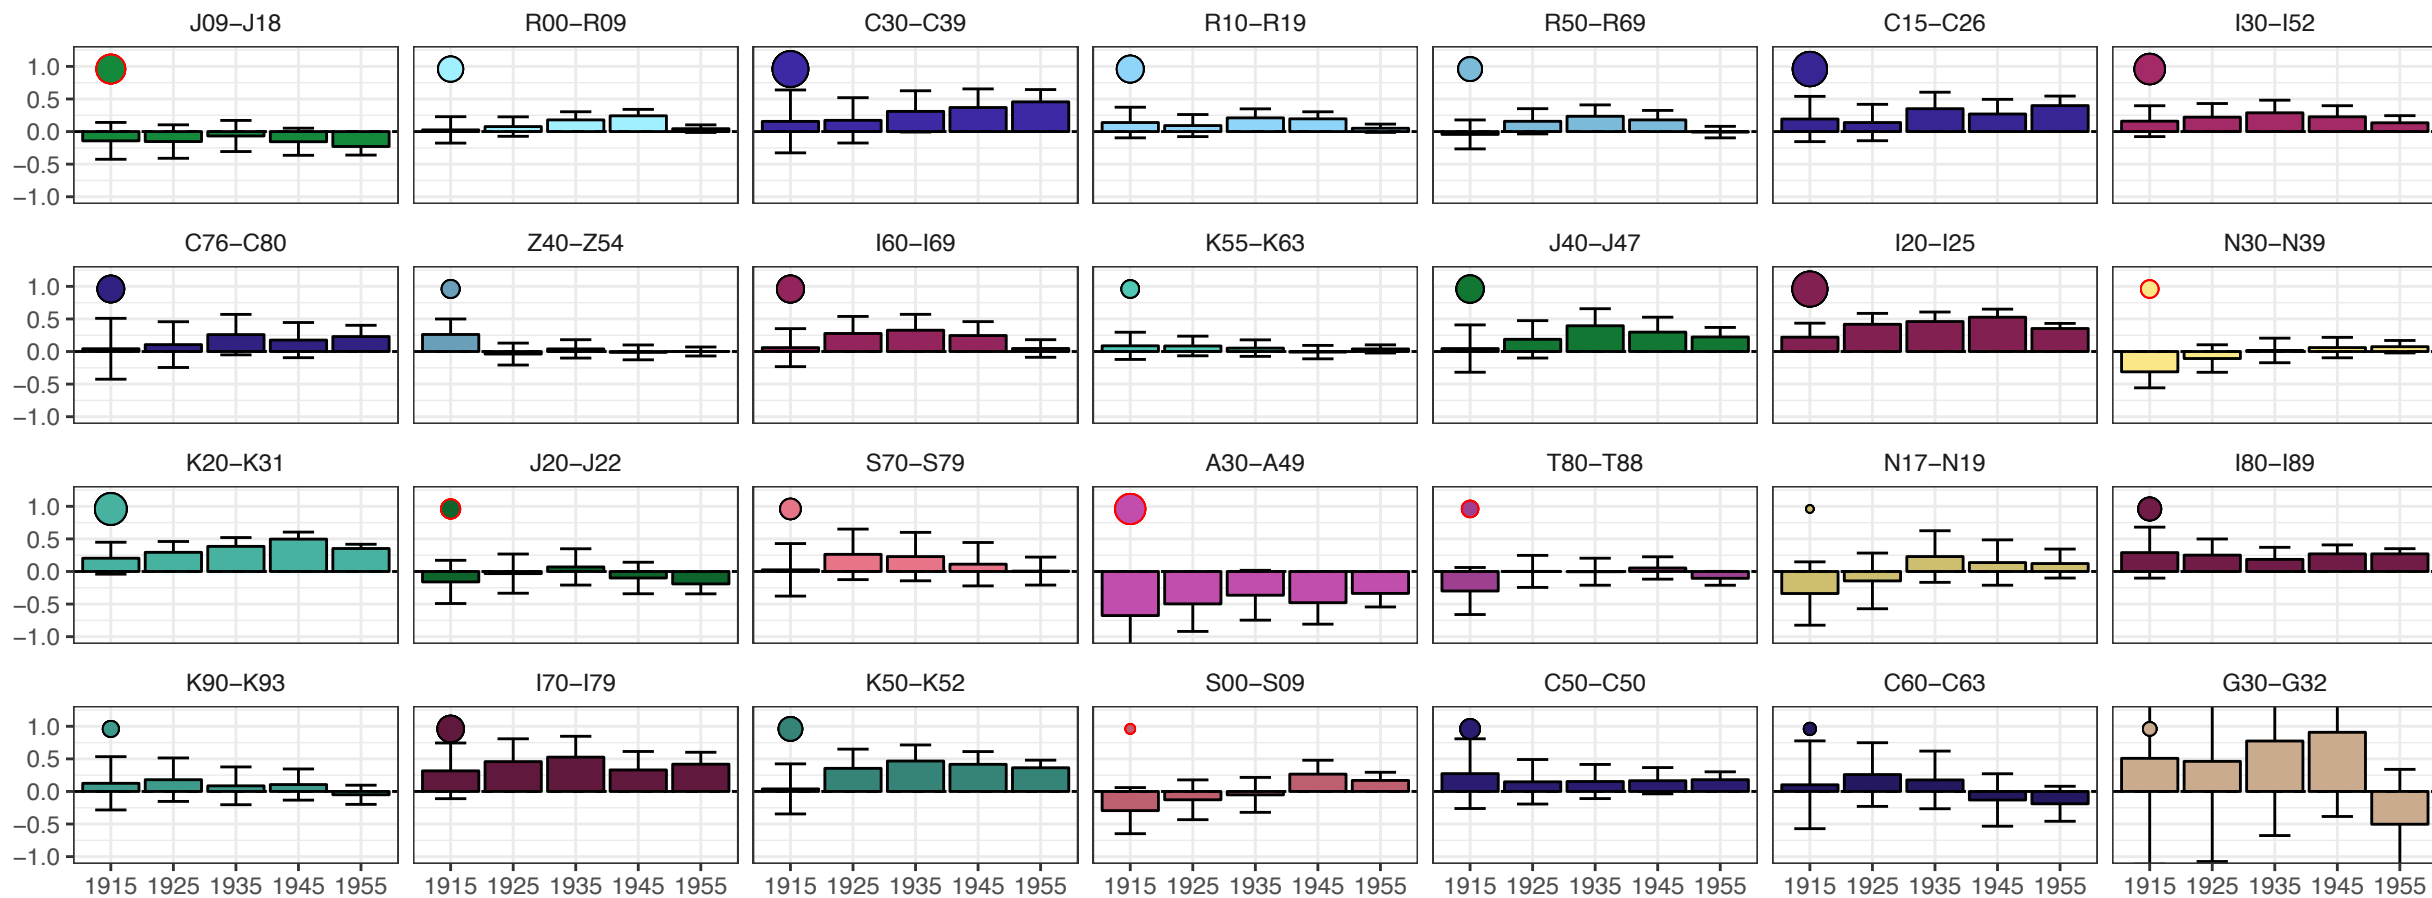

Decade of birth commencing

deprivation: 6

ACT-DTH

EST-DTH

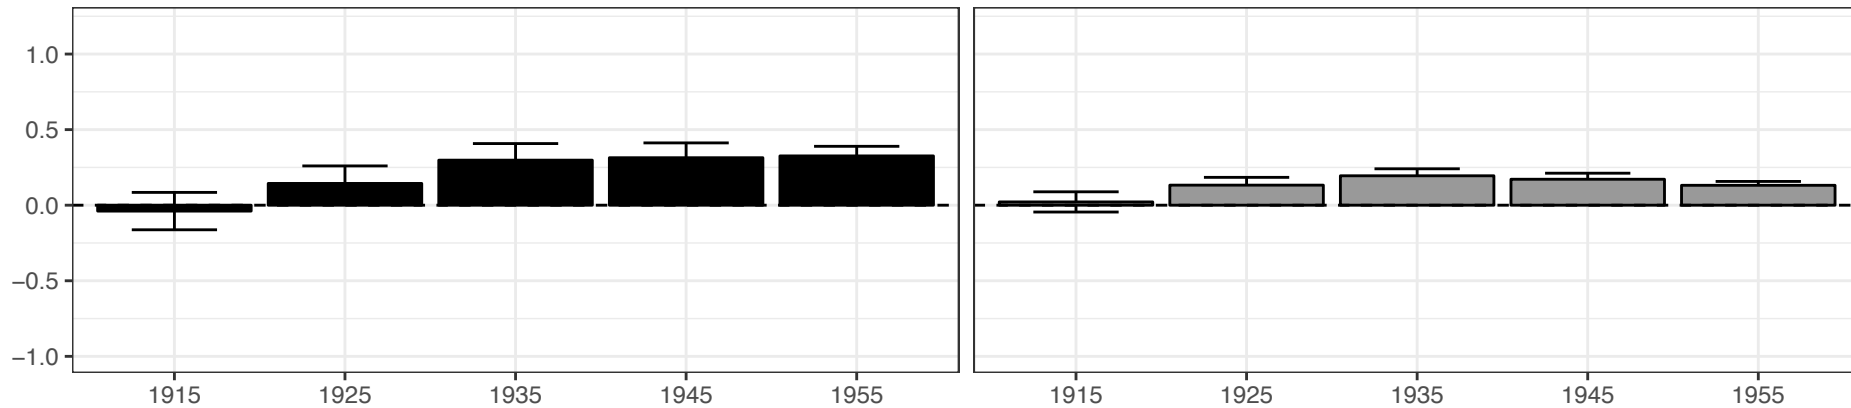

Improvements in hospital admission rate

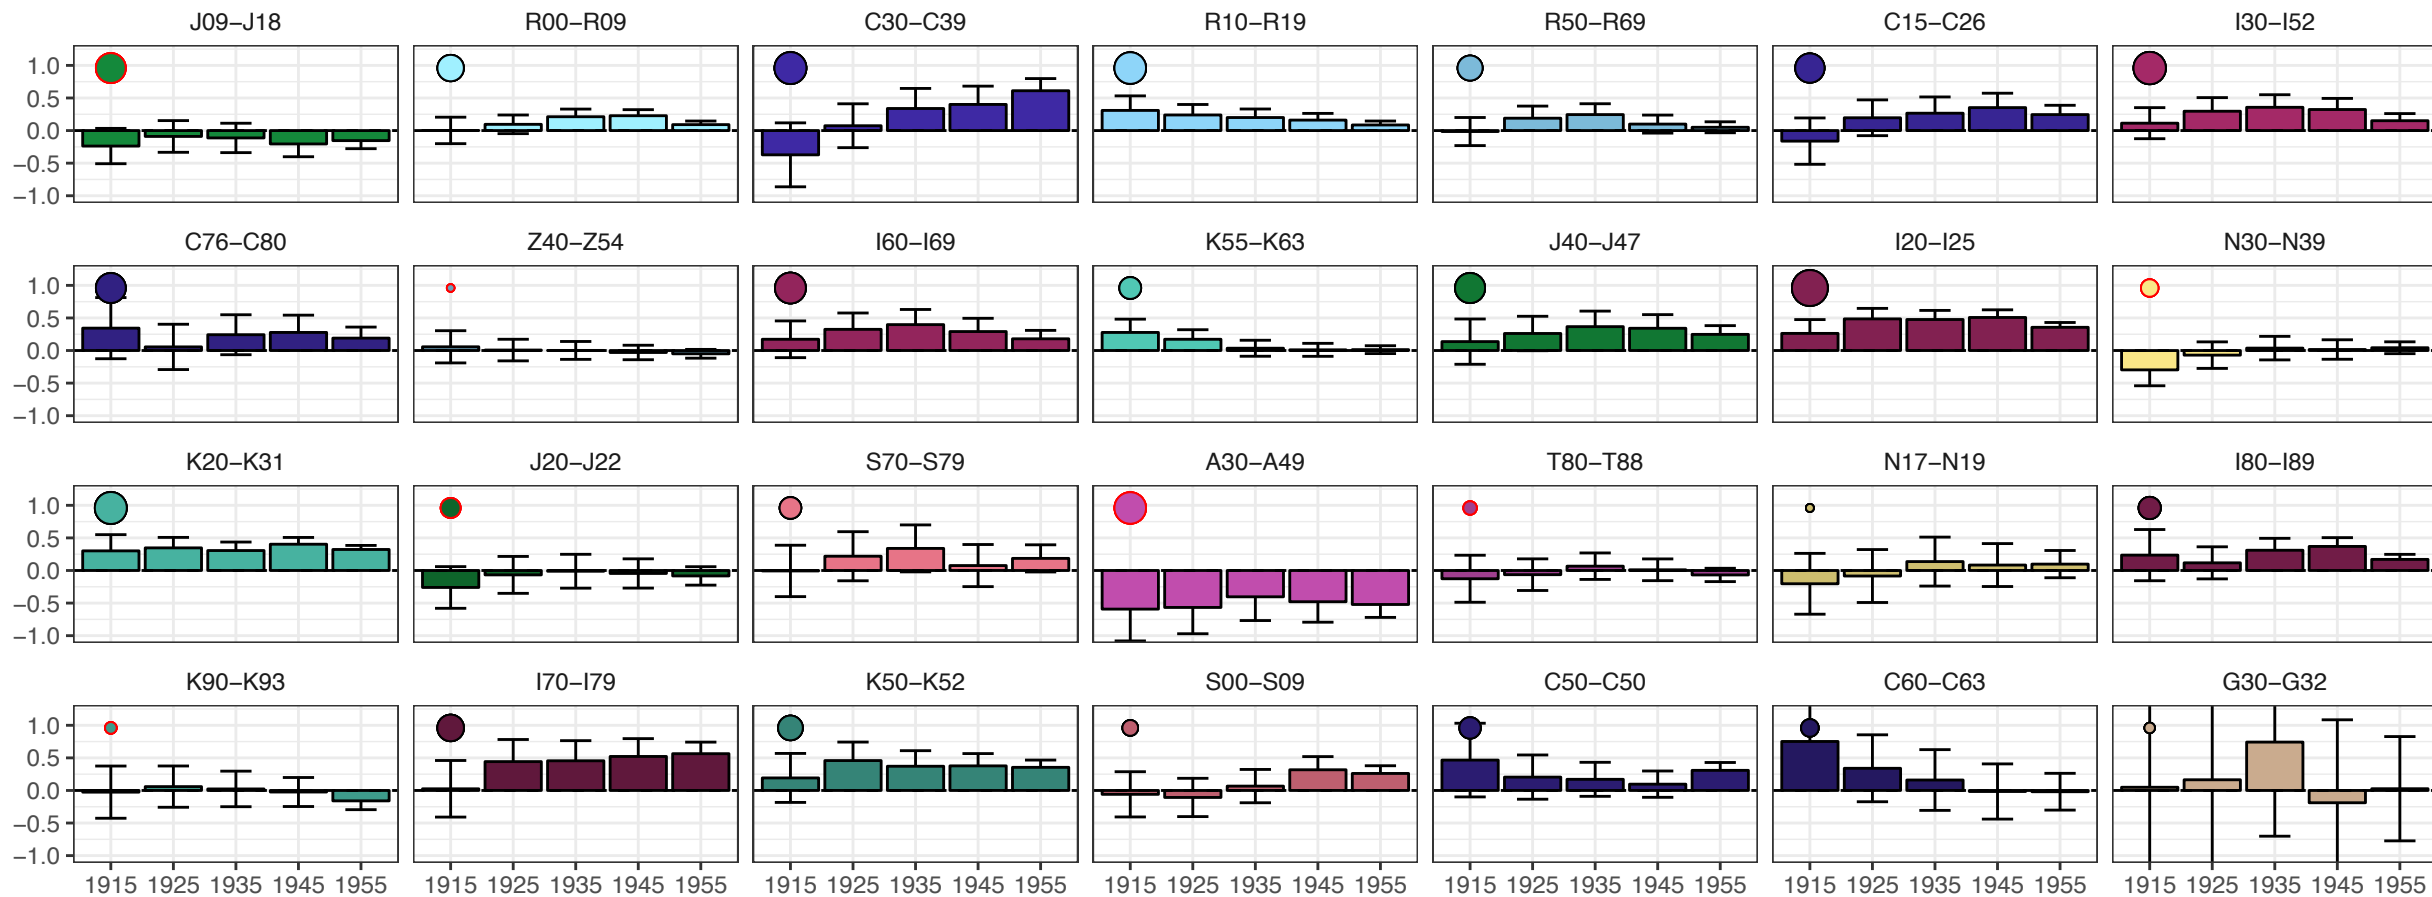

Decade of birth commencing



deprivation: 7

ACT-DTH

EST-DTH

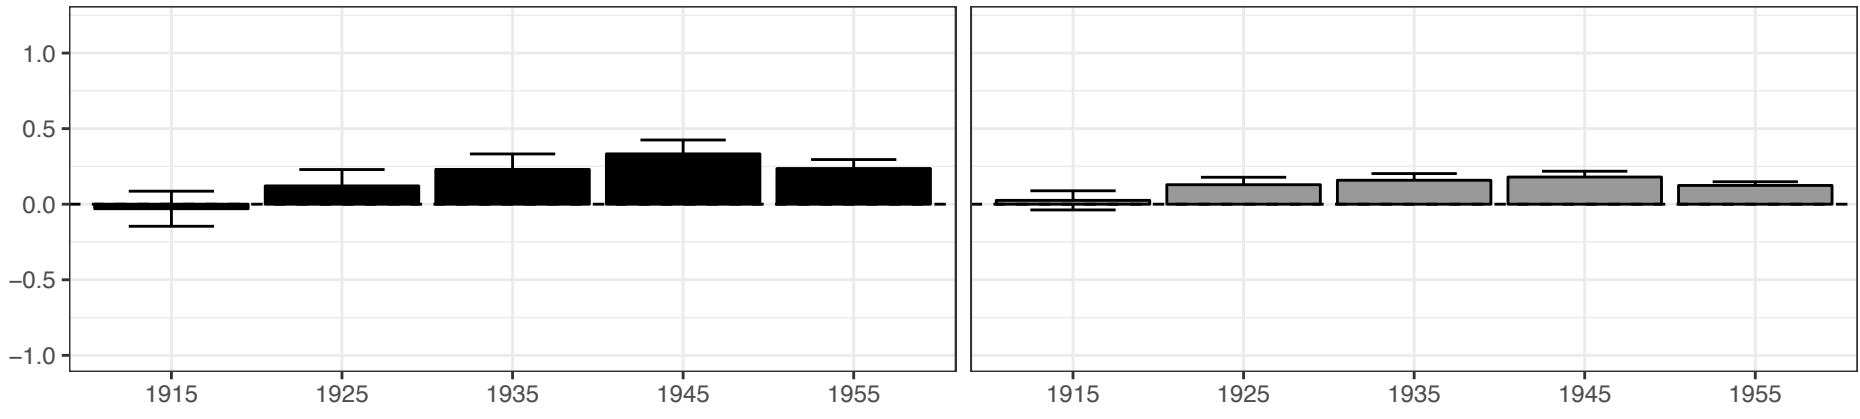

Improvements in hospital admission rate

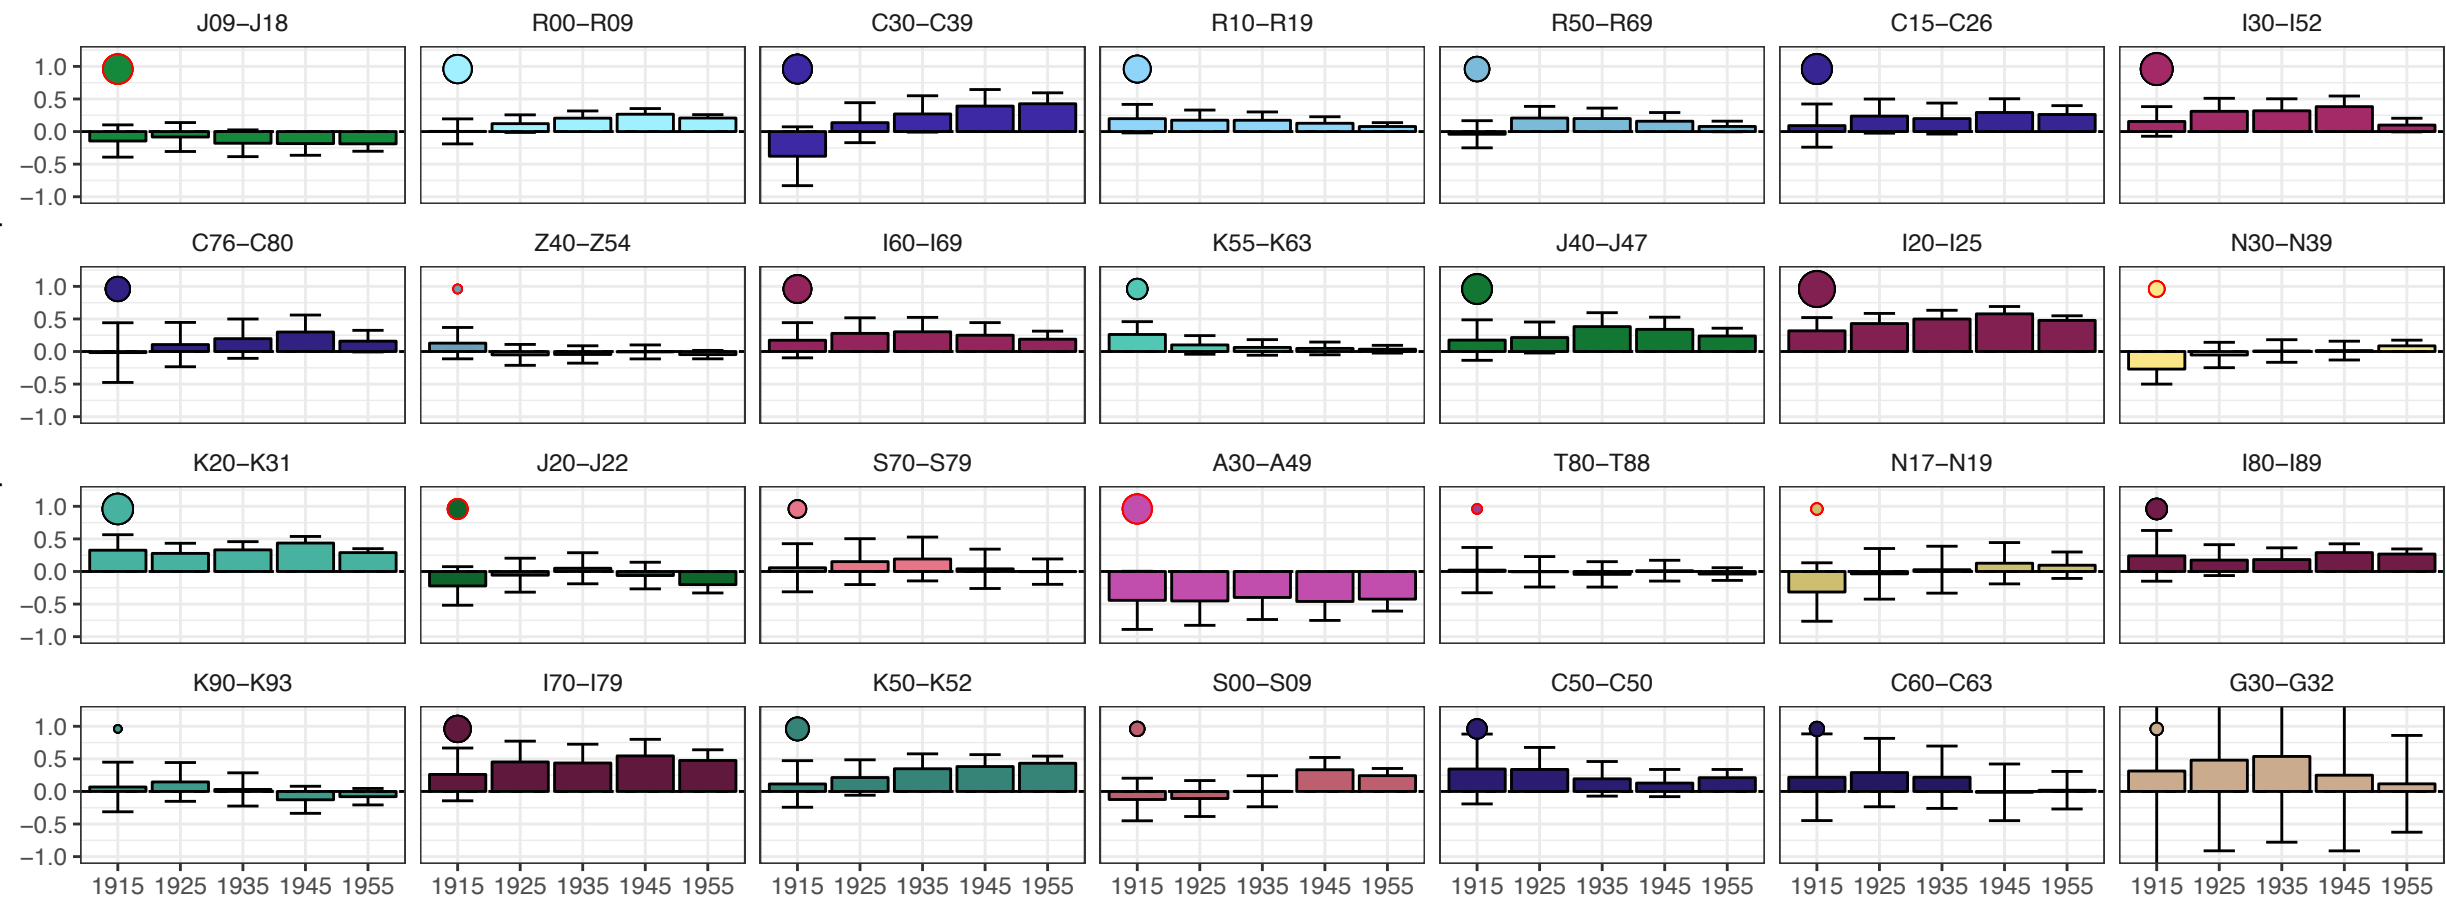

Decade of birth commencing

deprivation: 8

ACT-DTH

EST-DTH

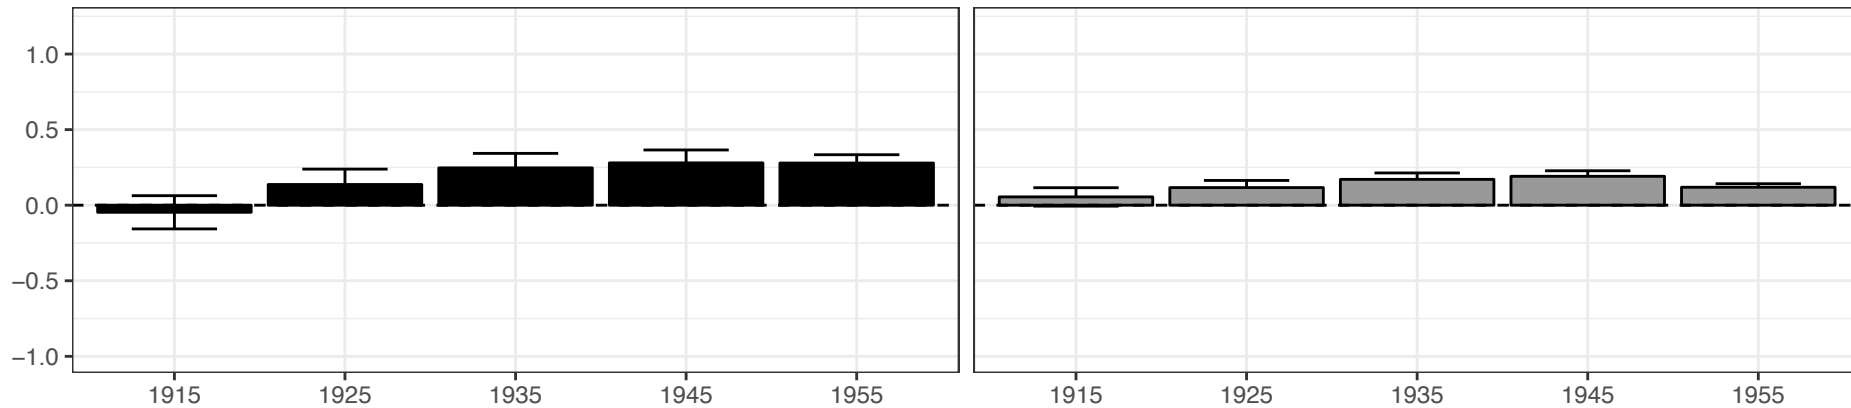

Improvements in hospital admission rate

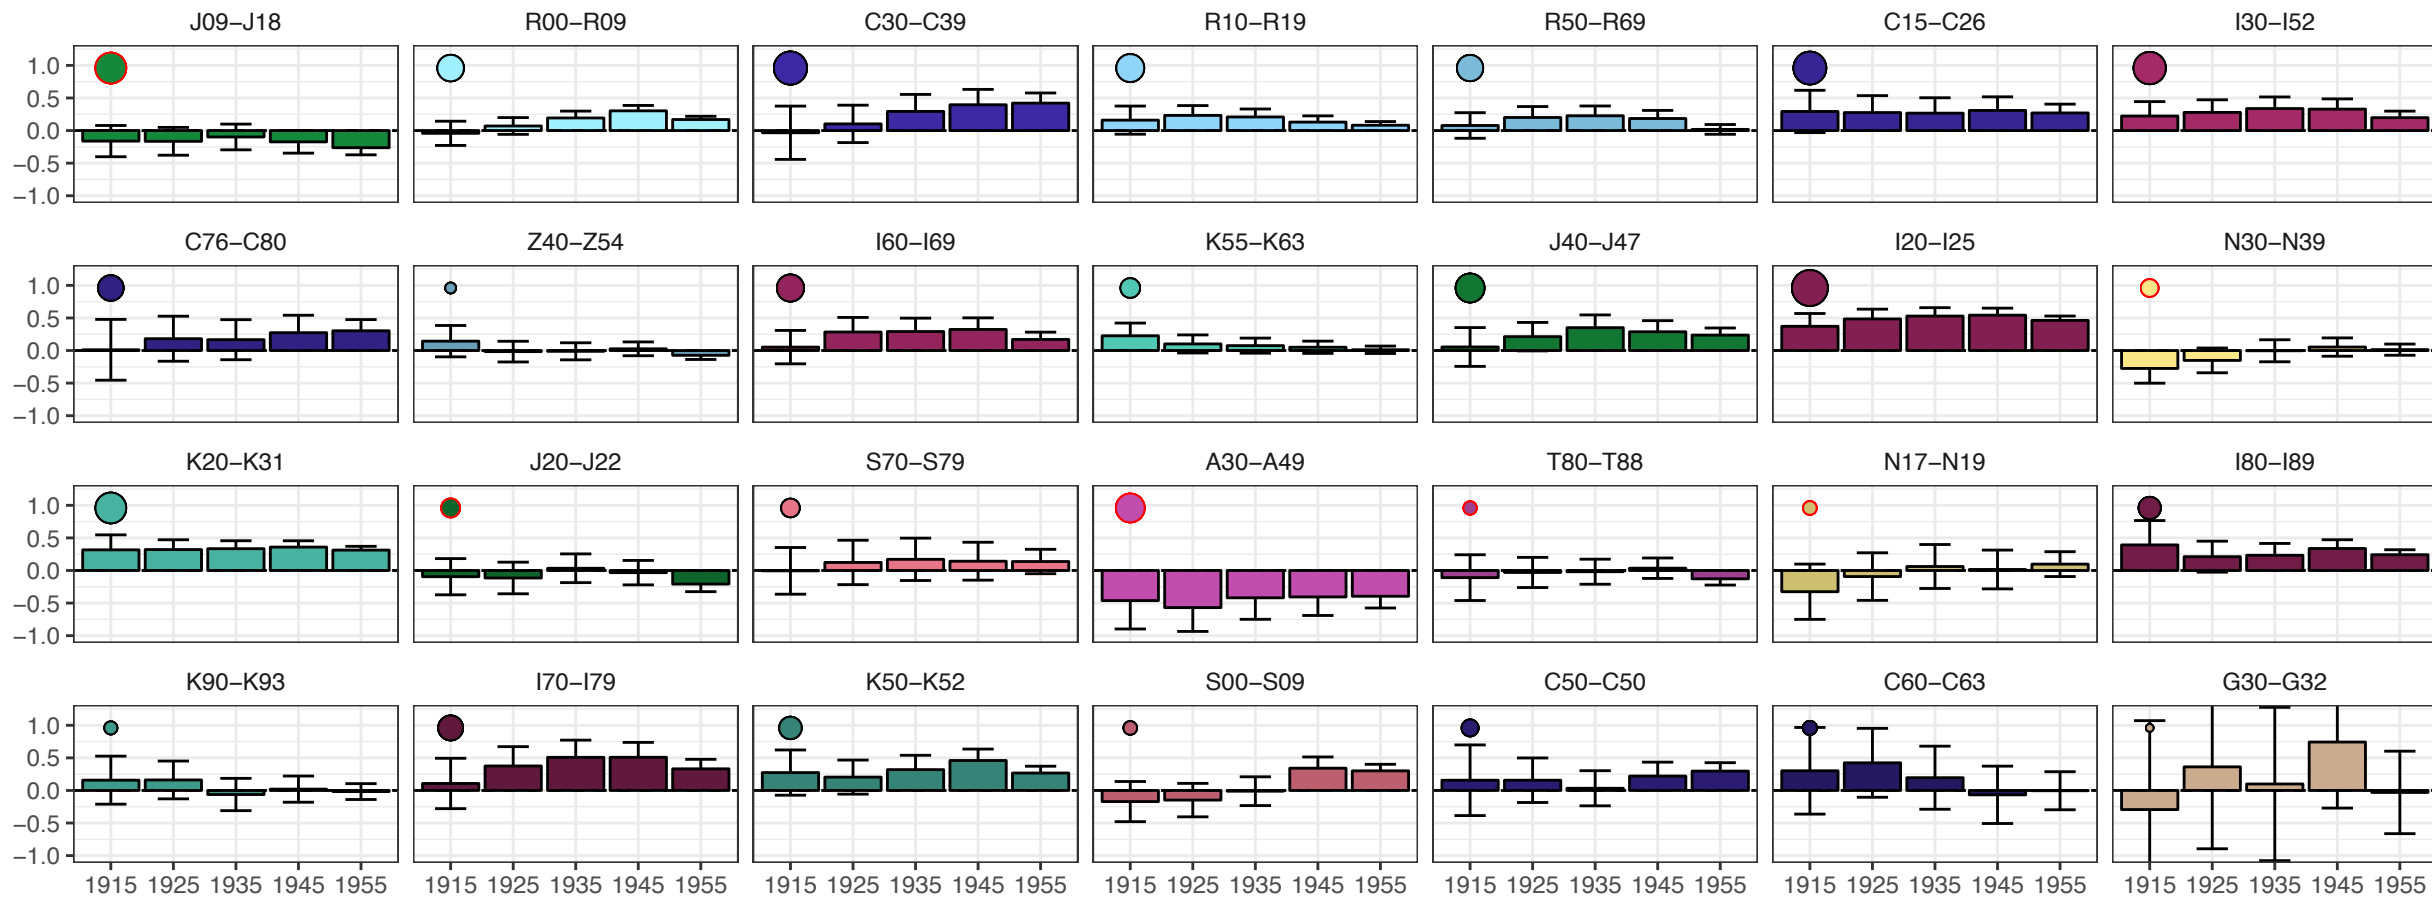

Decade of birth commencing

deprivation: 9

ACT-DTH

EST-DTH

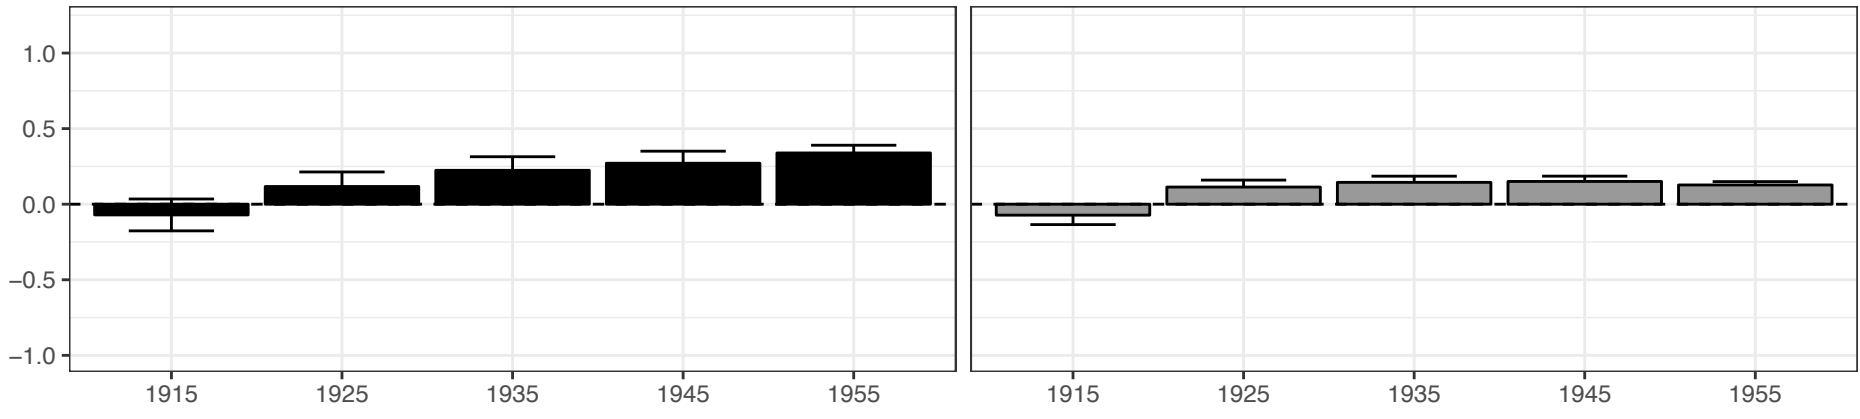

Improvements in hospital admission rate

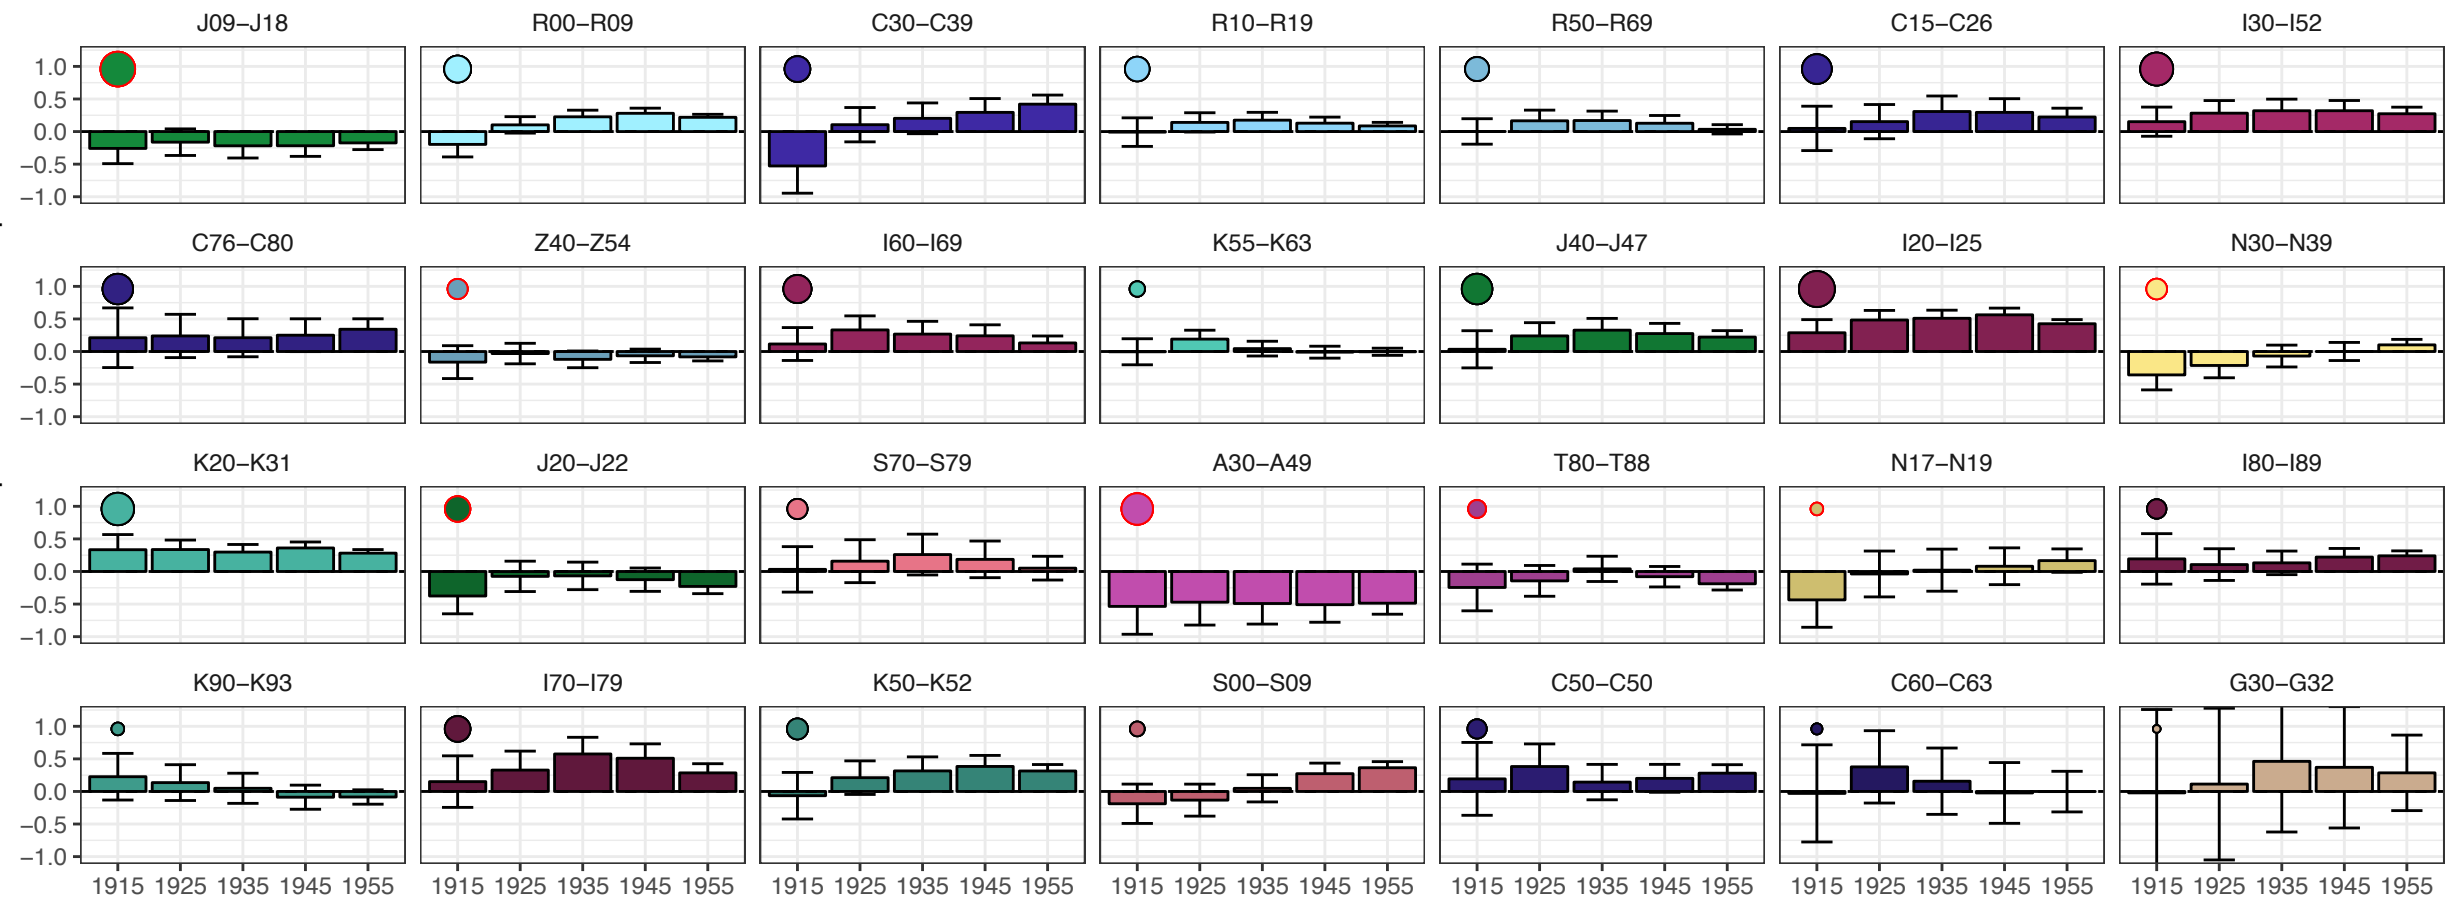

Decade of birth commencing

deprivation: 10

ACT-DTH

EST-DTH

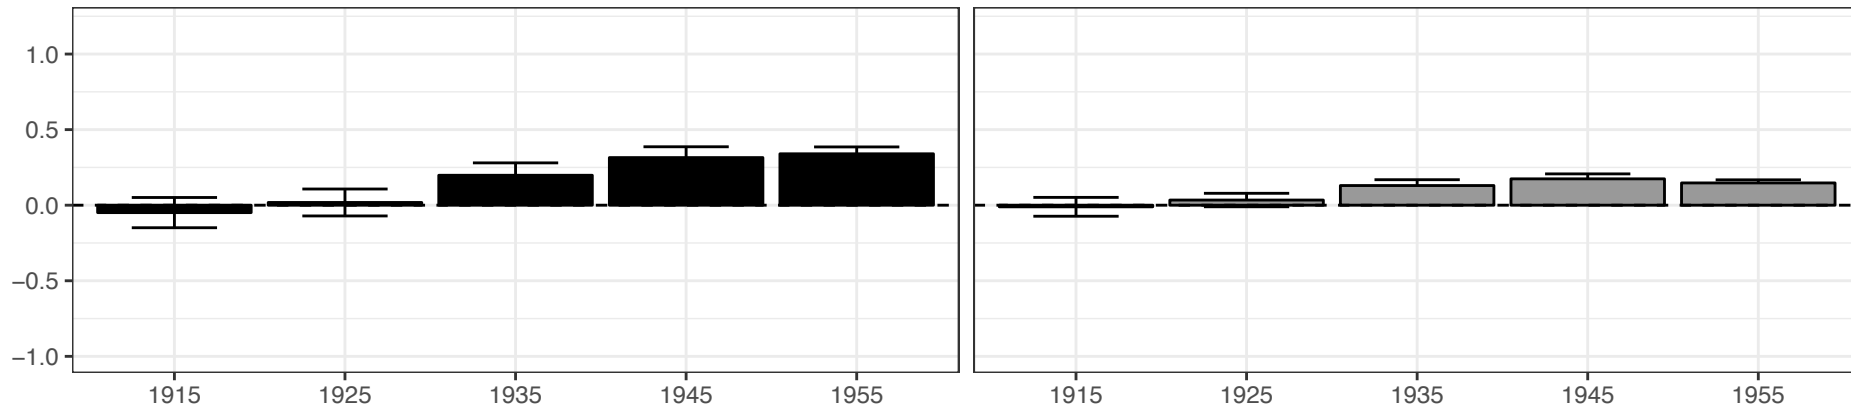

Improvements in hospital admission rate

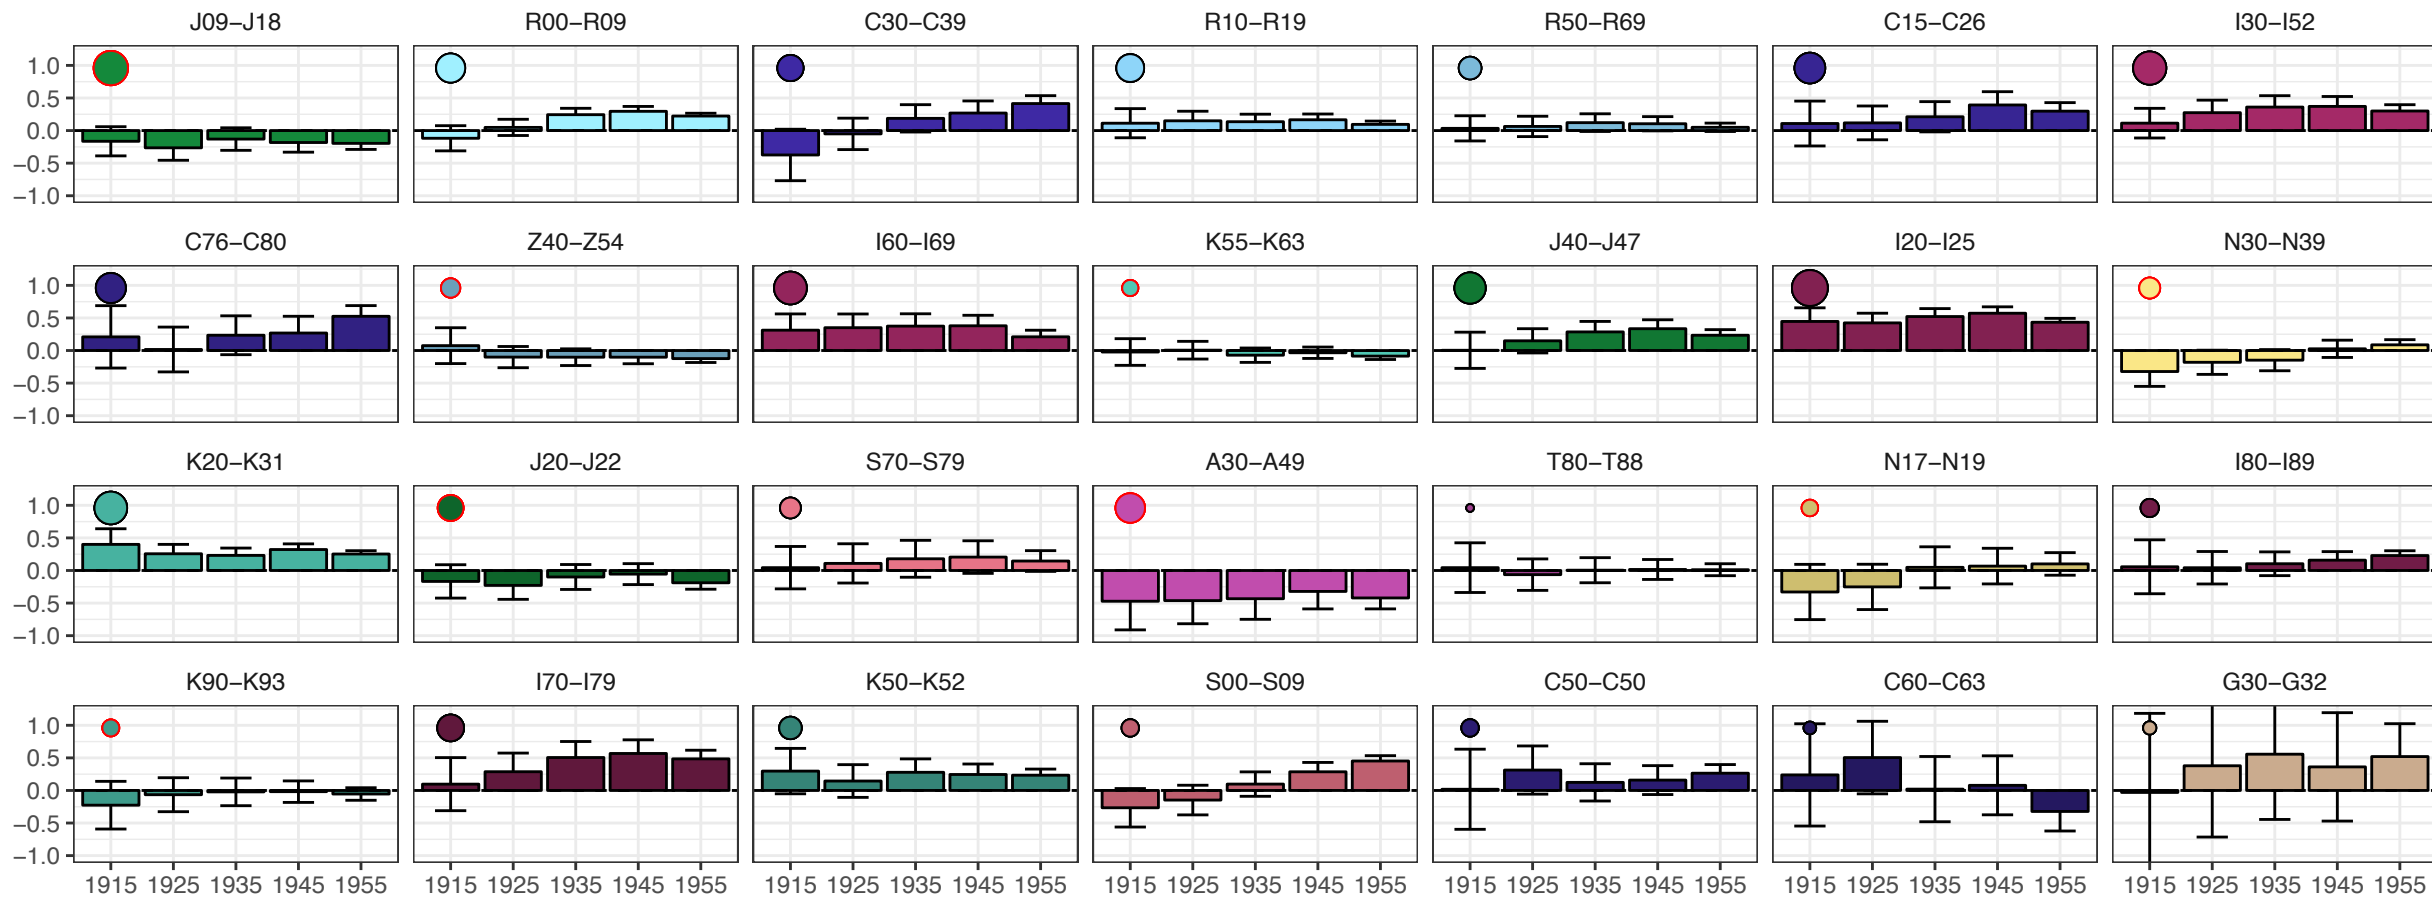

Decade of birth commencing
